# Supplementary material for: Envisioning the use of in-situ arm movement data in stroke rehabilitation: Stroke survivors’ and occupational therapists’ perspectives
Source: PubMed Central journal article supplement (PMC9584451; doi:10.1371/journal.pone.0274142), 2022-10-20
Supplement: pone.0274142.s003.pdf [file pone.0274142.s003.pdf]

**Supporting Therapists' Practice**

**Using Sensor-Based Patient Arm Movement Information**

University of Massachusetts

University of Maryland

Harvard Medical School

# What Are Current Challenges?

## Capacity

Learned and practiced  
in Rehabilitation  
Setting

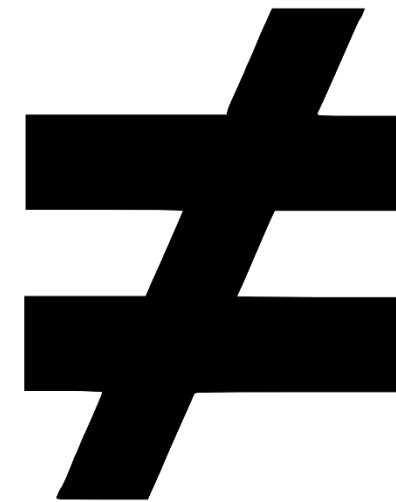

## Performance

Transfer of learned  
skills in Daily Living

## What Are Current Challenges?

How  
Patients  
Use Their Arms  
**Outside Hospitals?**

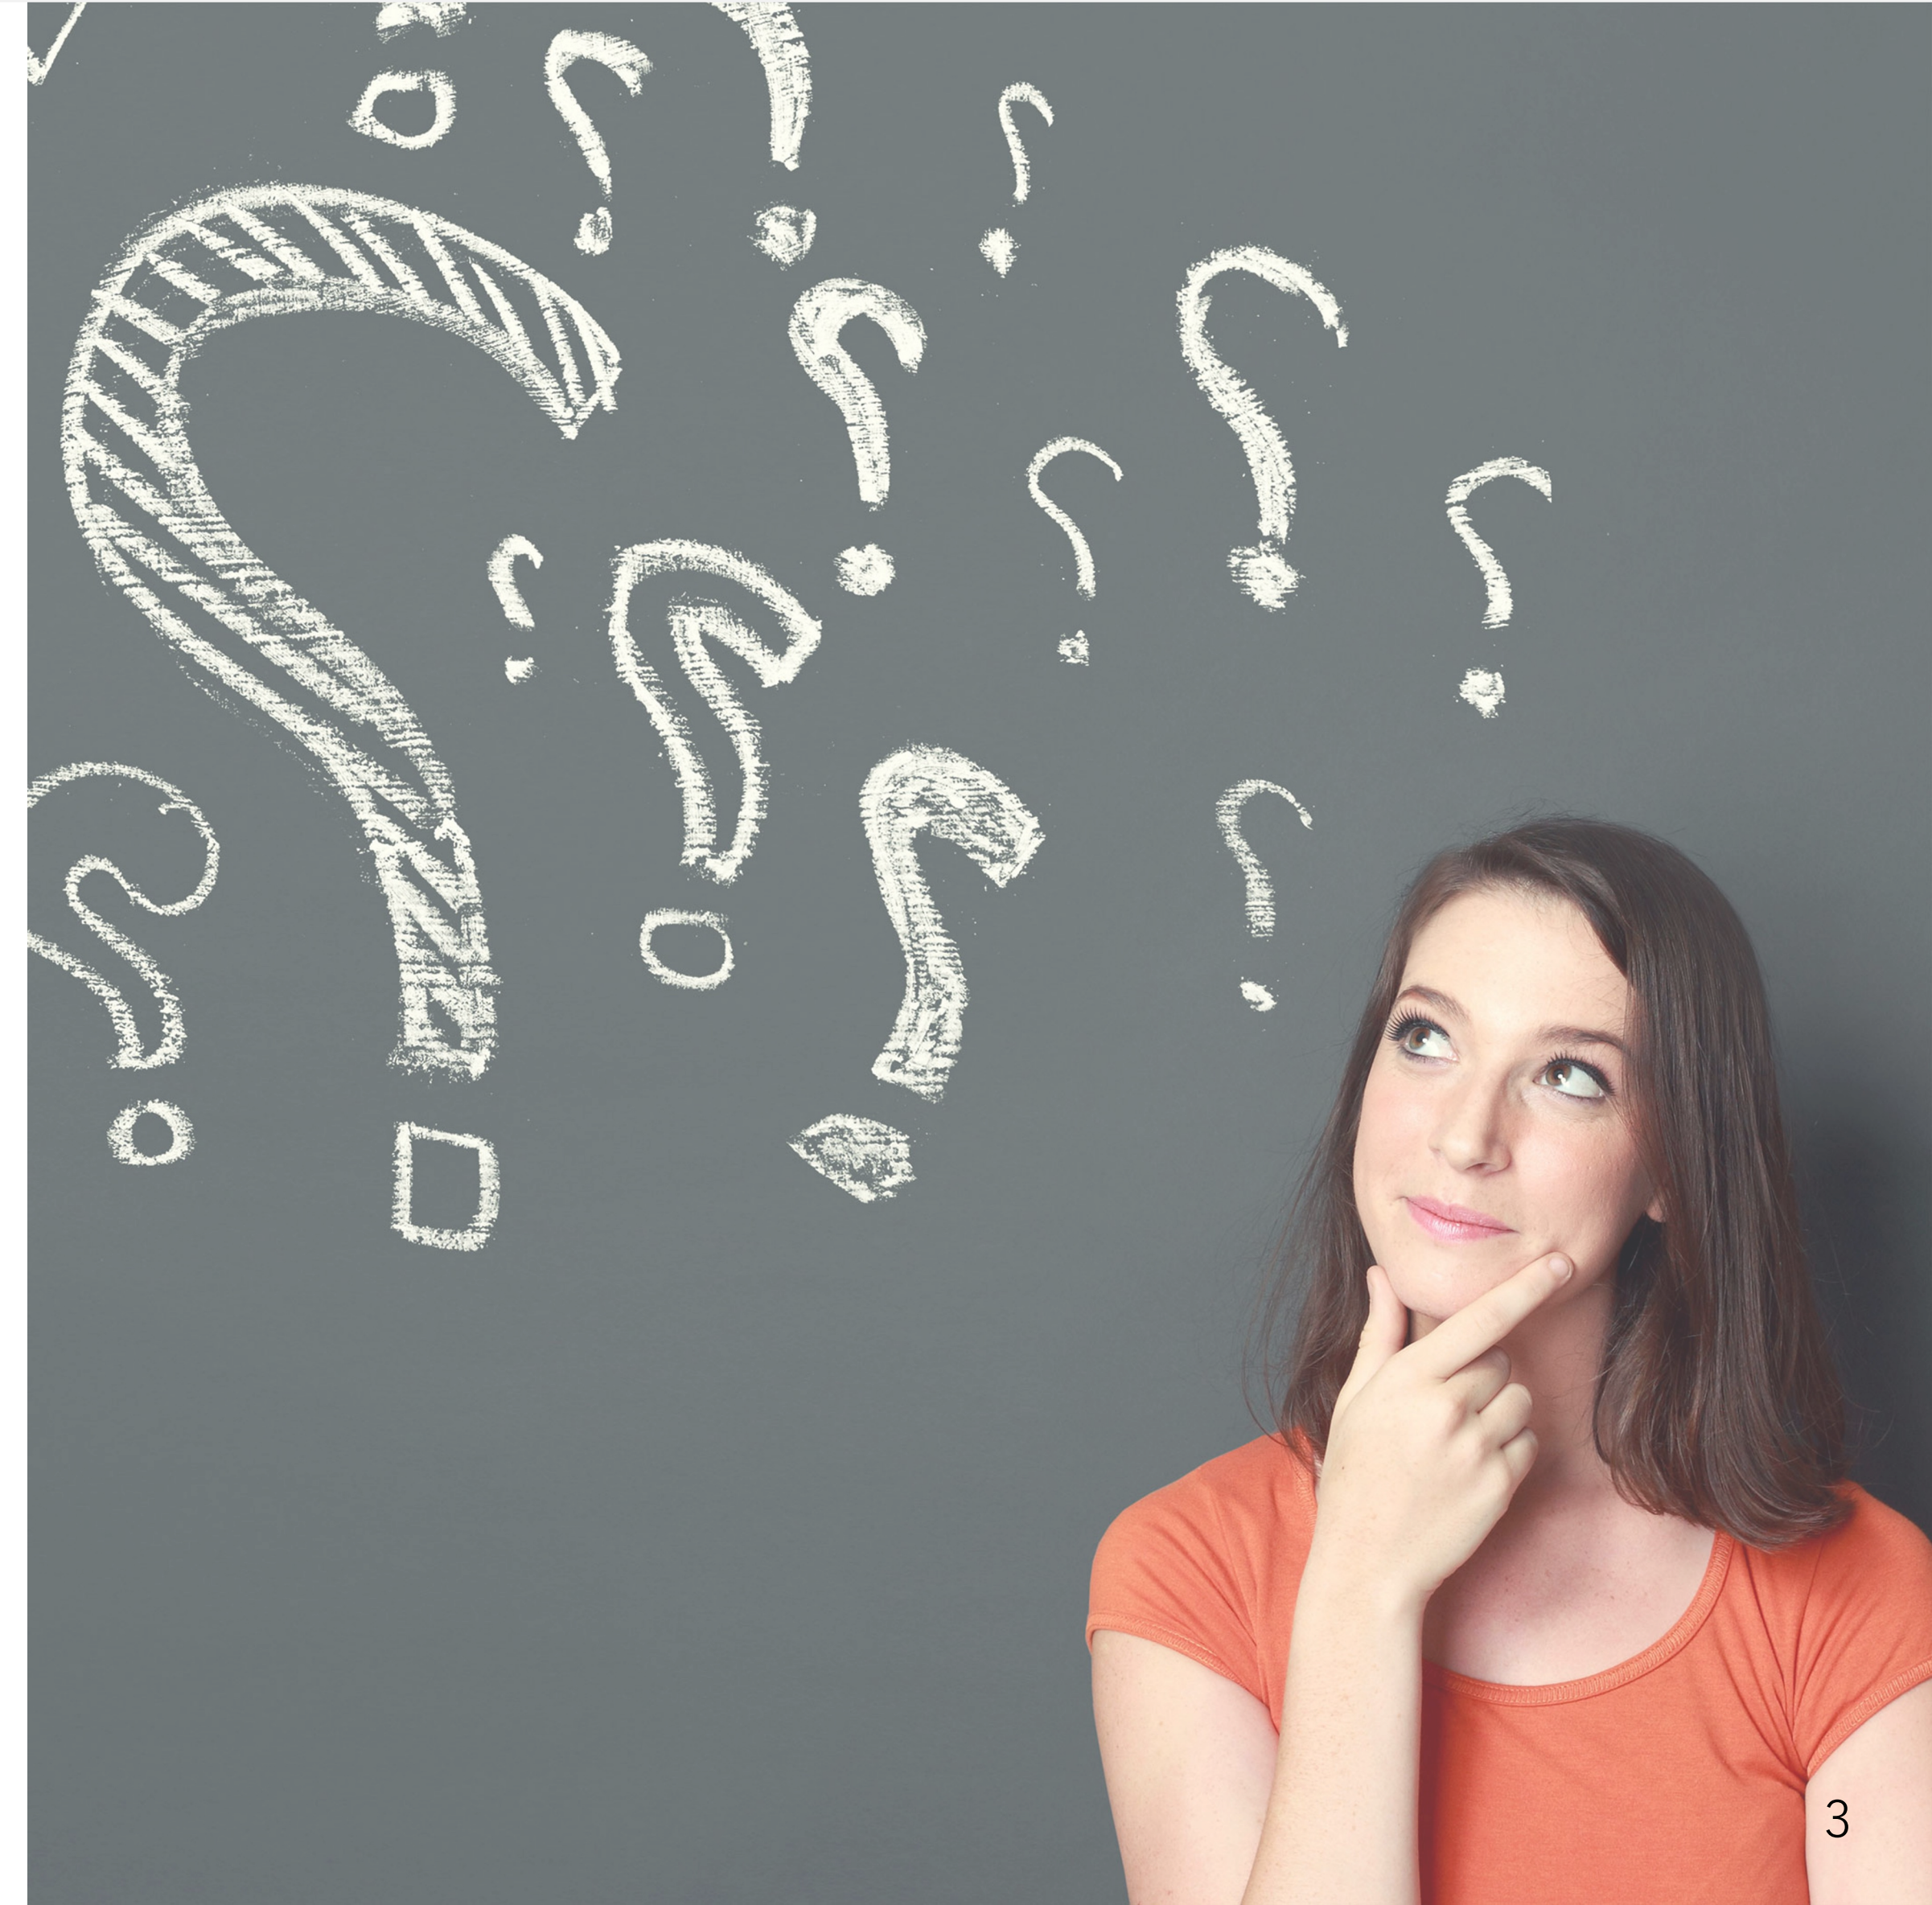

## What Does Our Research Aim?

Encourage **Patients** to use their affected arm during activities of daily living

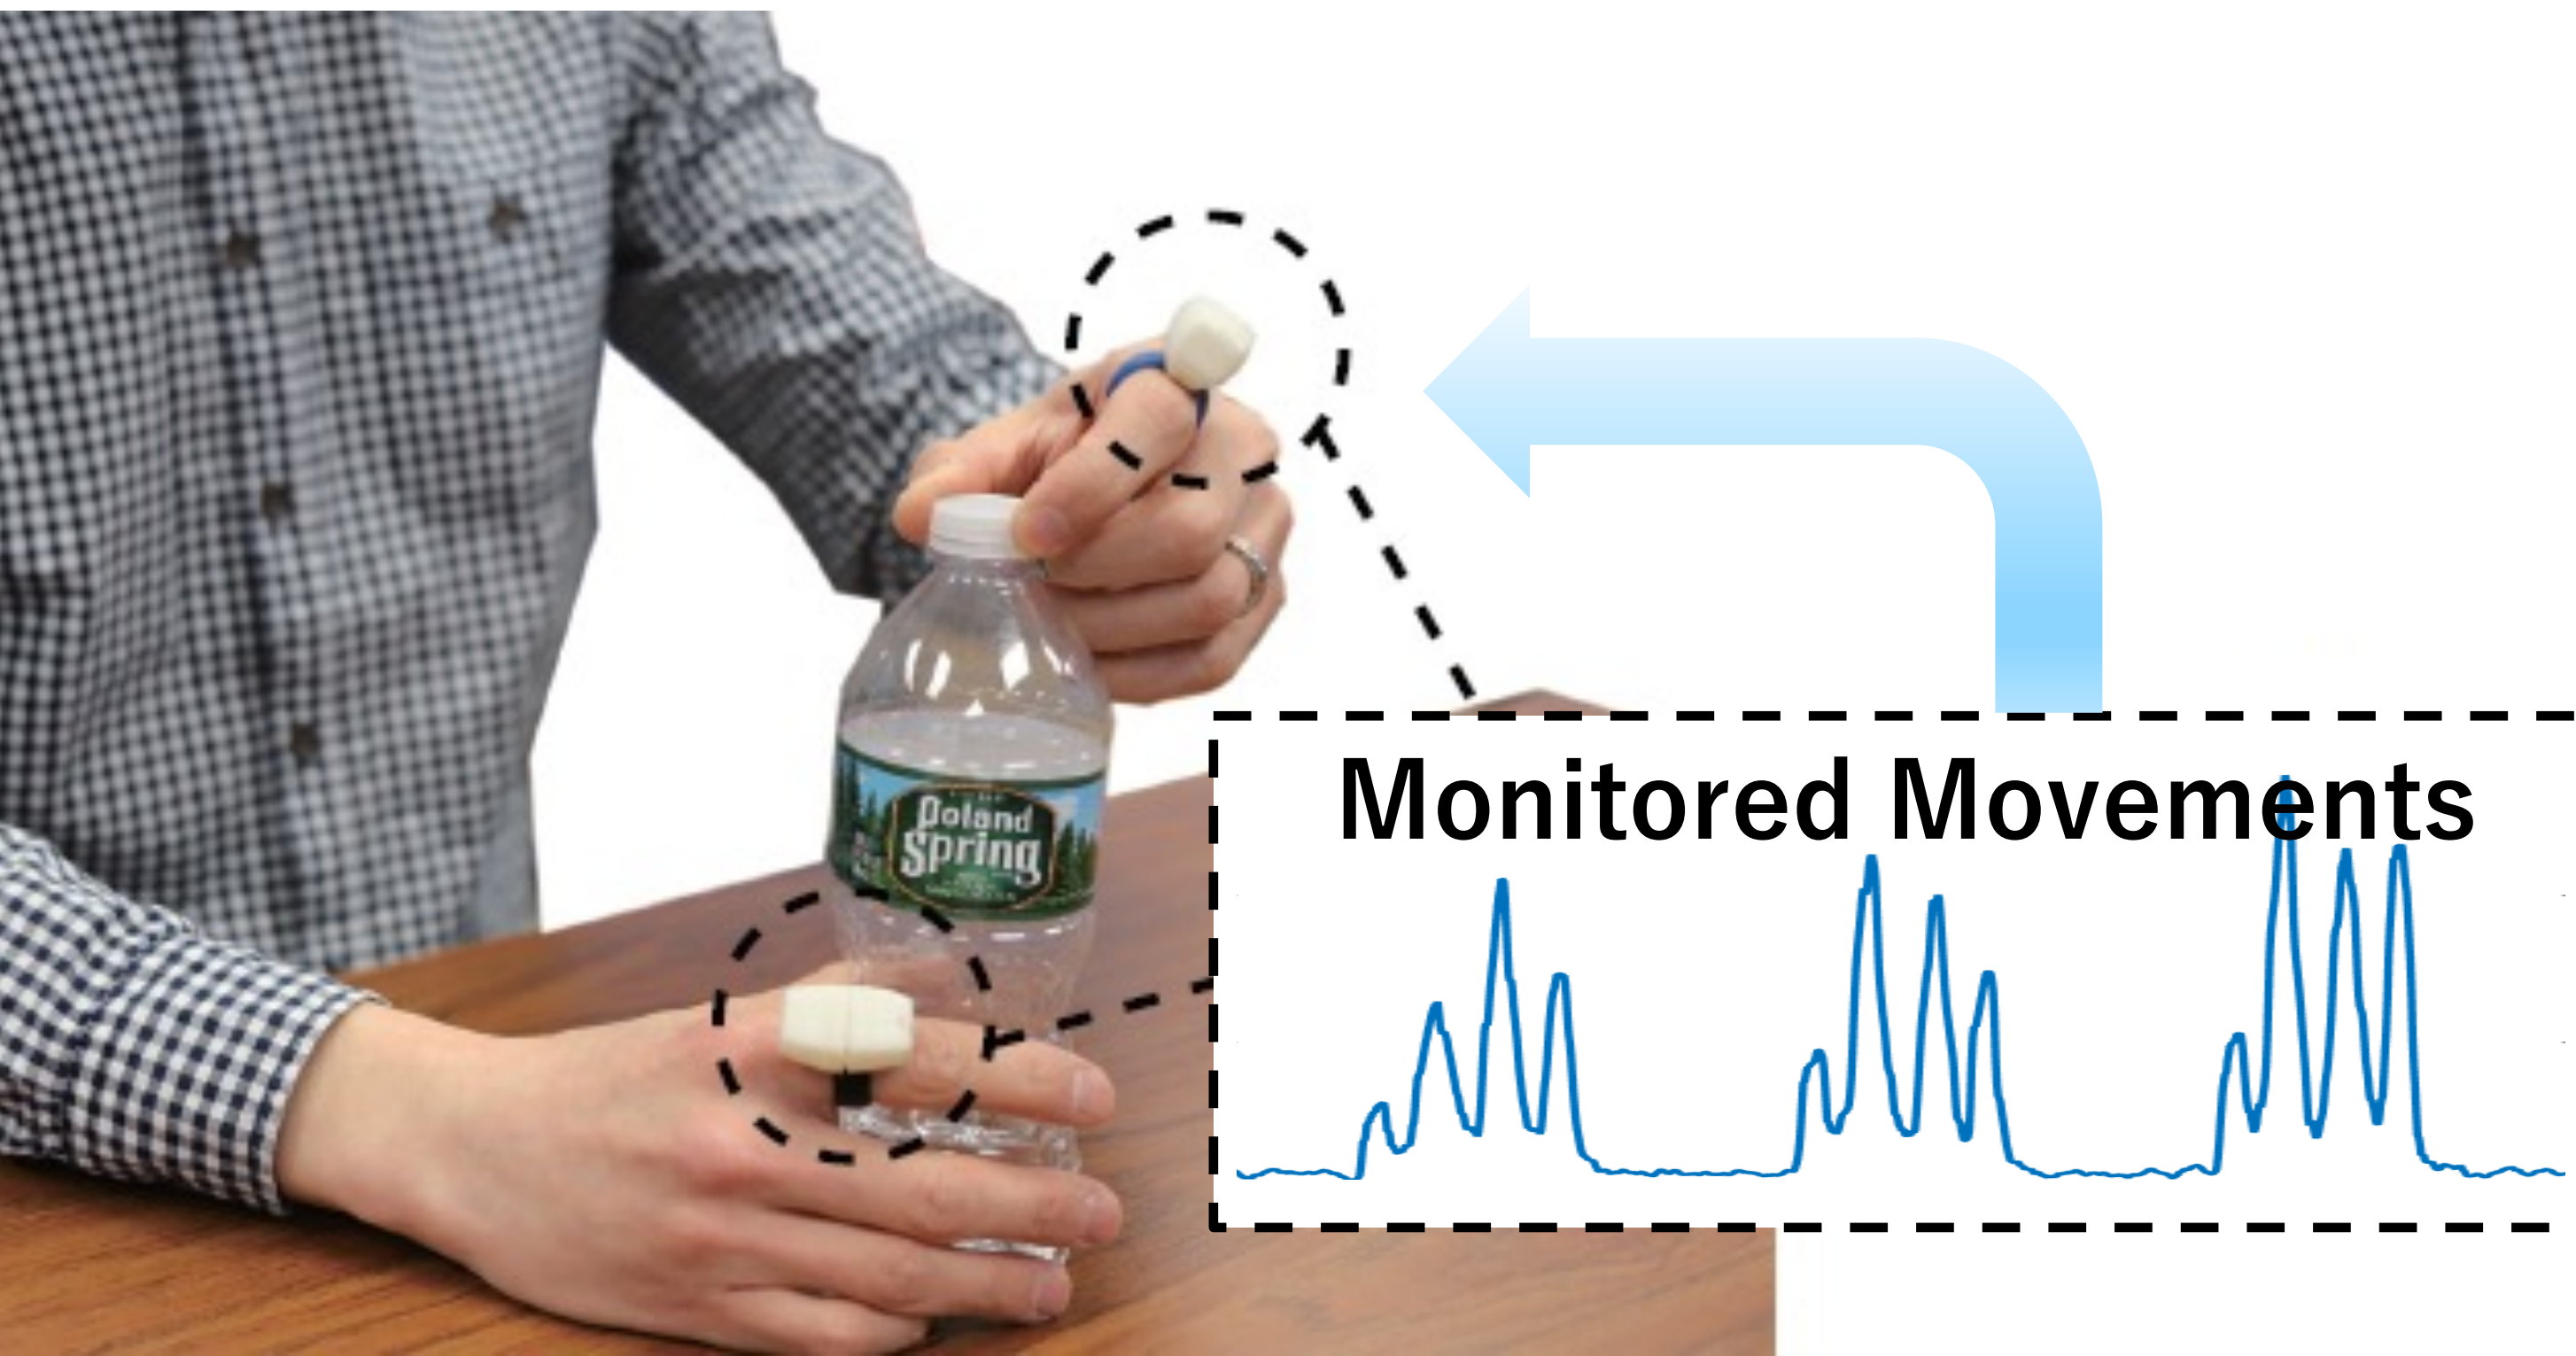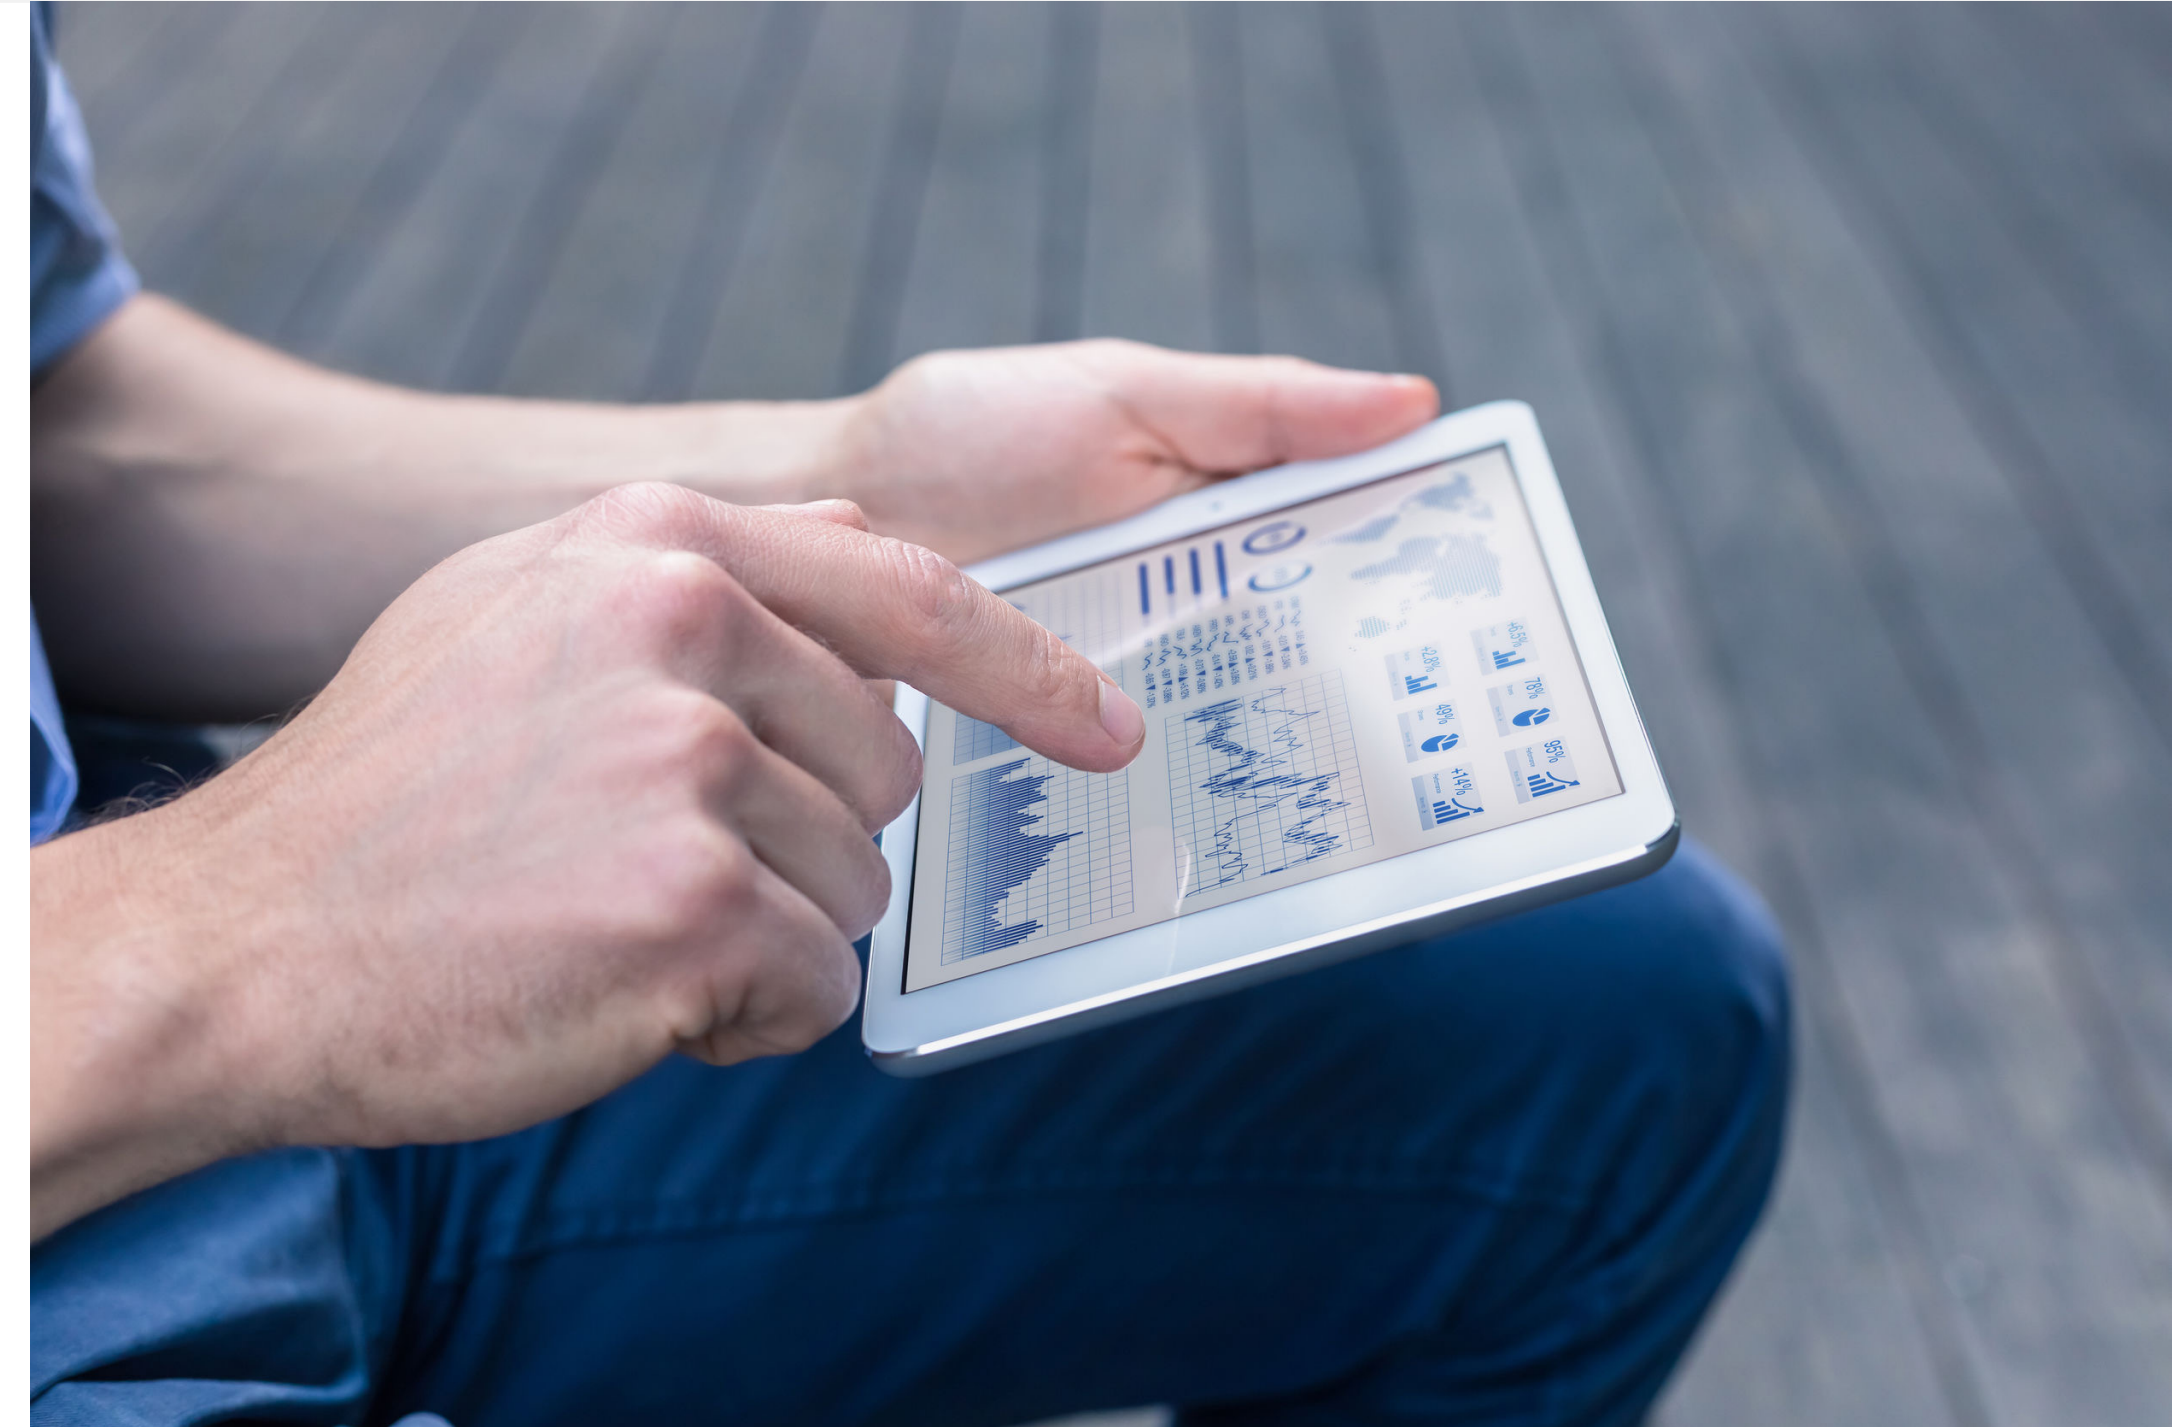

Help **Therapists** Monitor Patients and Personalize Therapy

## What Does Our Research Aim?

Encourage **Patients** to use  
arm during activities of daily

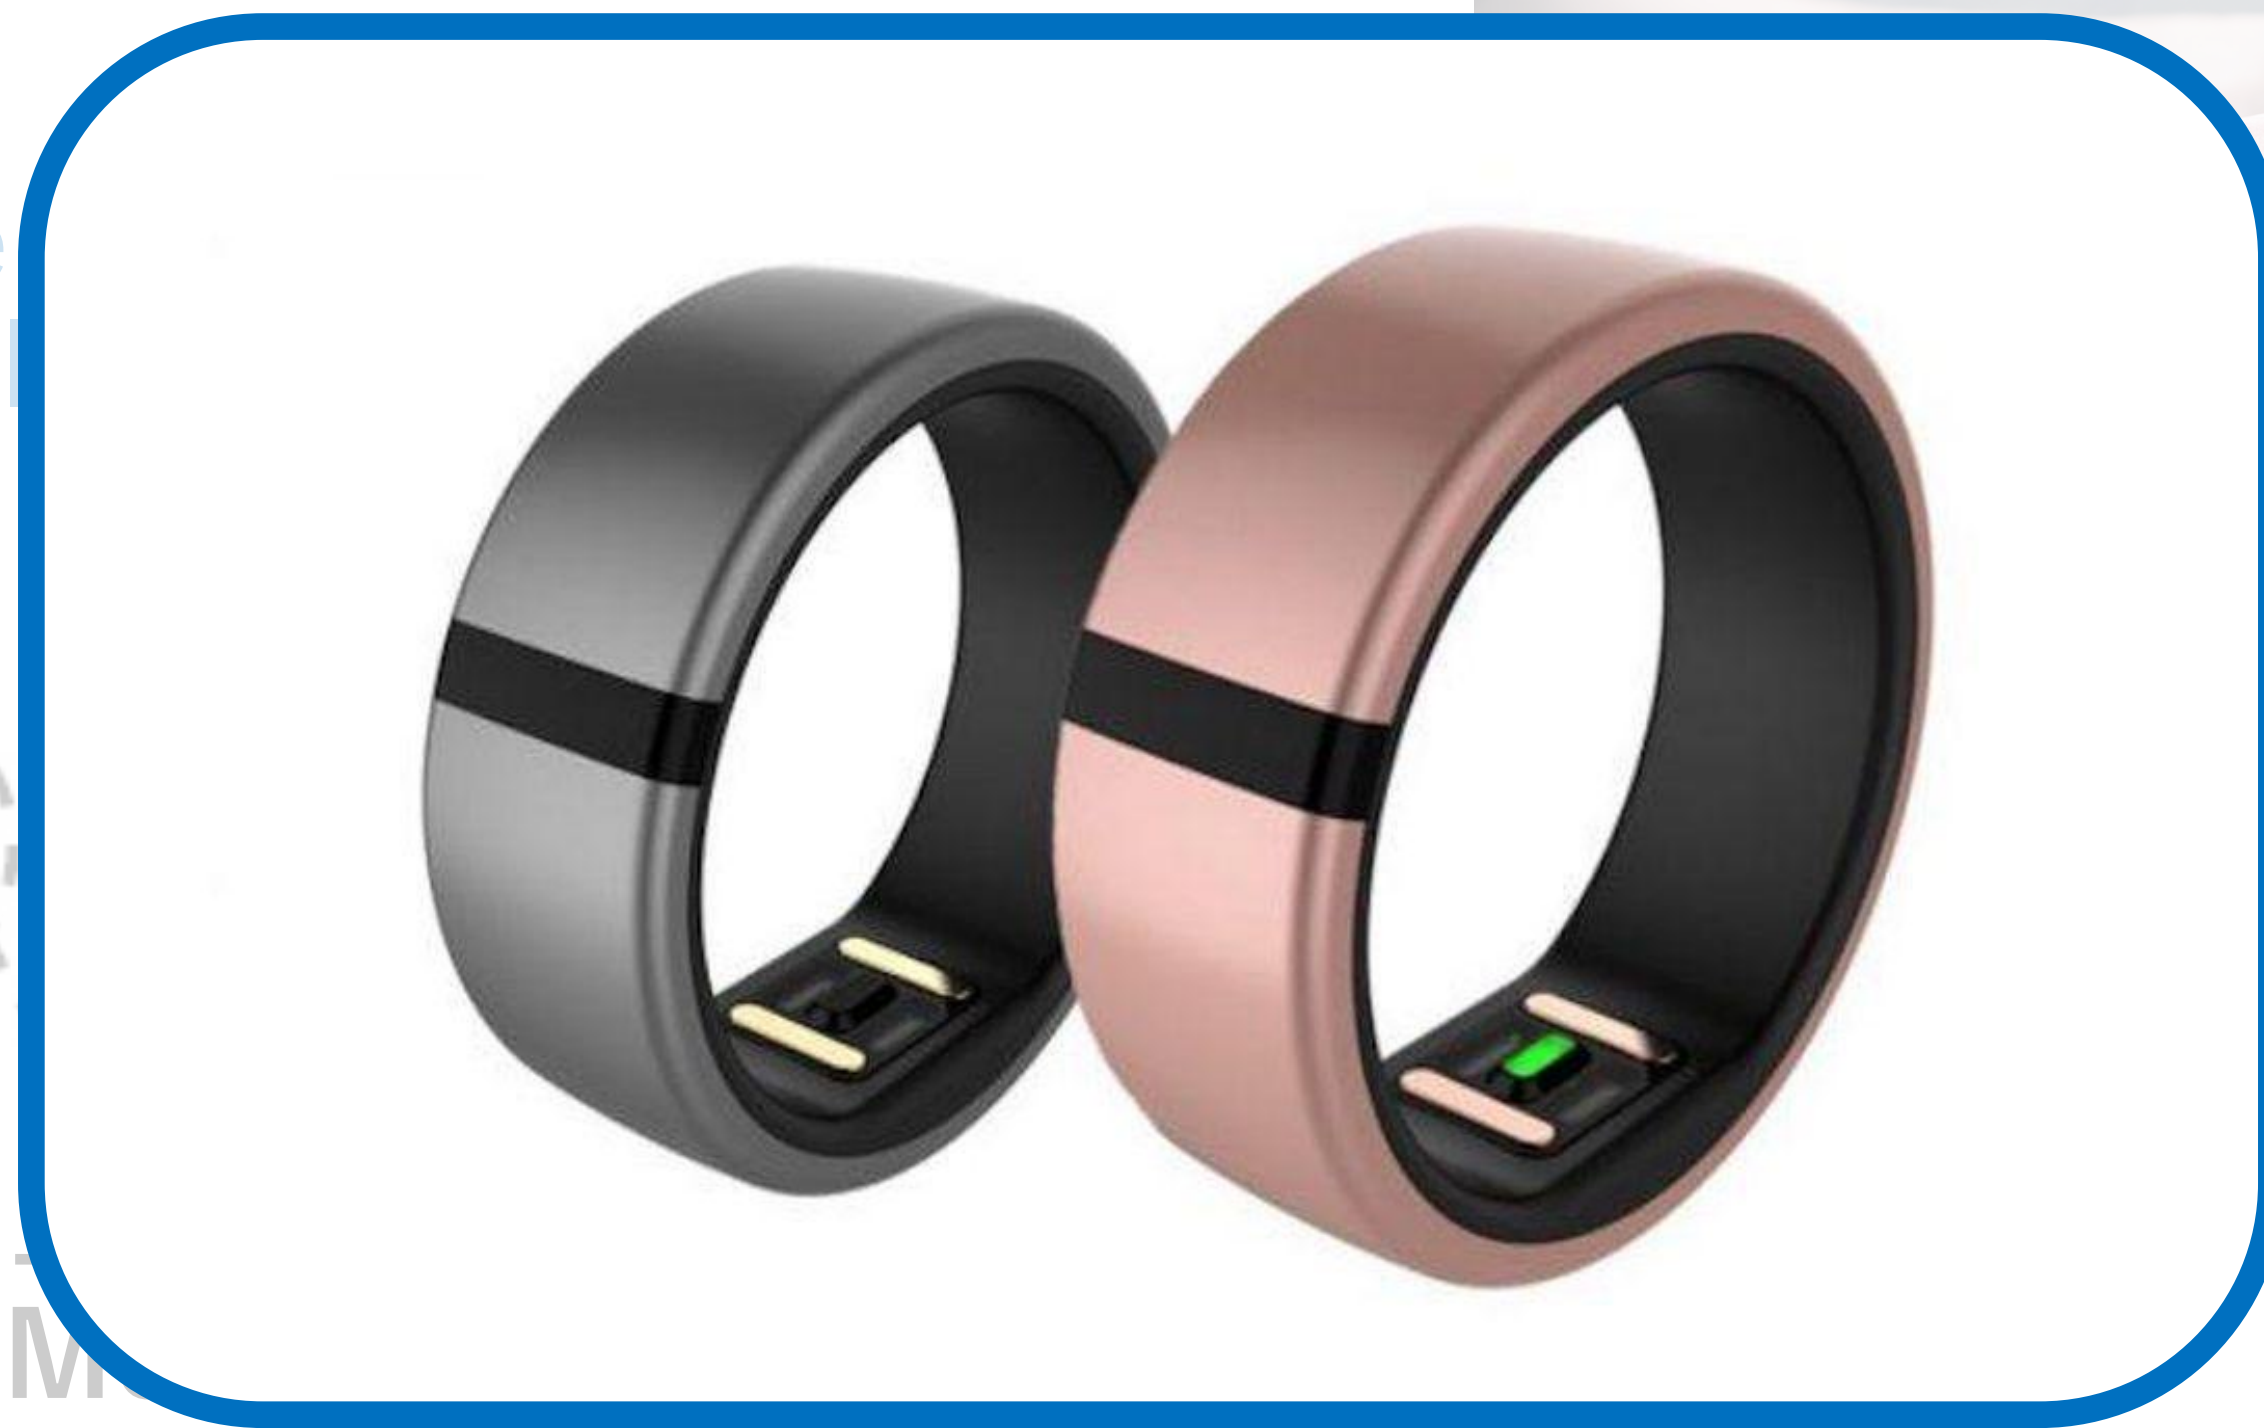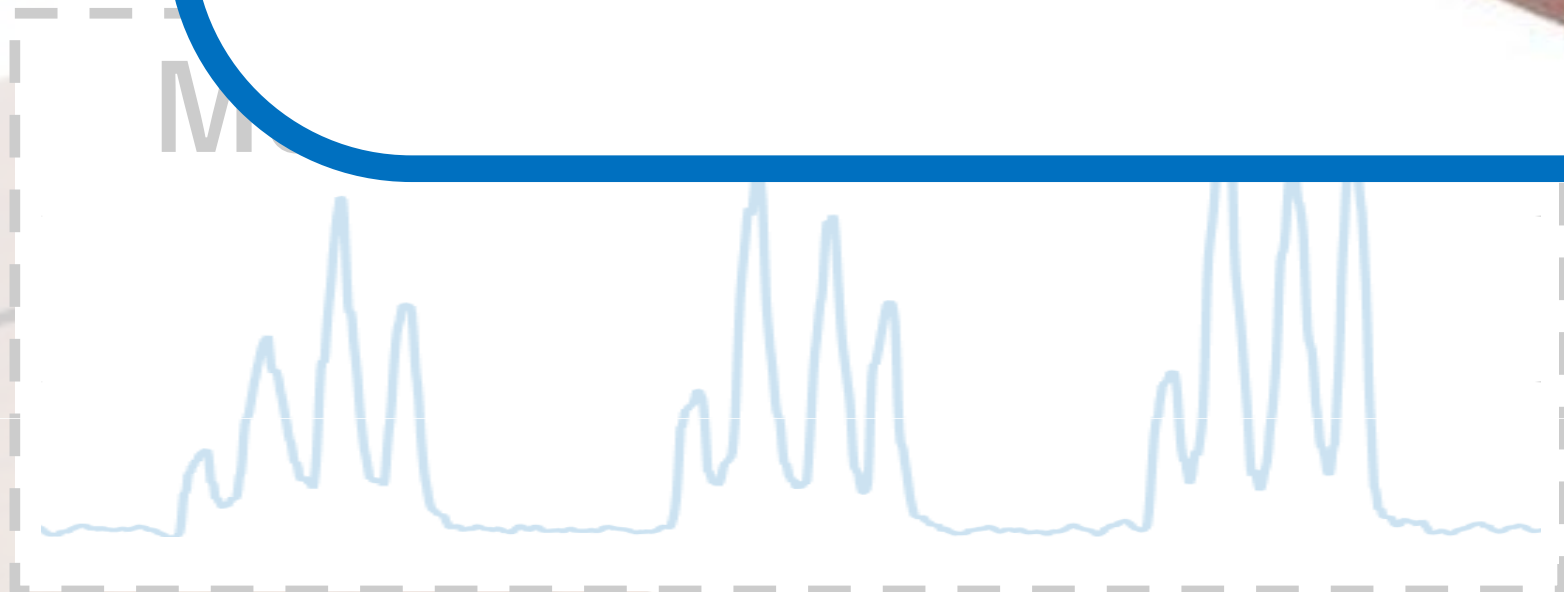

Help **Therapists**  
Monitor Patients  
and Personalize  
Therapy

## What Is This Study For?

-  **Typical practices of outpatient therapy session**
-  **How you make use of the sensor-generated patient movement information**
-  **How such usage affects therapy practices and their quality**

## What Is Your Typical Therapy Practice When Seeing Outpatients?

- A** Number of therapy sessions or patients
- B** Assessment of patients' function in therapy sessions (standardized tools)
- C** Remote follow-ups between therapy sessions

# What Is Your Typical Therapy Practice When Seeing Outpatients?

## Rehabilitation Therapy Routine

- A** Assess patients' motor status/recovery
- B** Evaluate adherence
- C** Identify attainable therapeutic goal
- D** Administer in-person rehabilitation therapy
- E** Prescribe home-exercise



## What Information Can We Provide Using Sensor Data?

**Ratio**

— Ratio of Affected Limb Use

**A-Duration**

— Duration of Affected Limb Use

**B-Duration**

— Duration of Bilateral Limb Use

# Meet James, Our Stroke Patient

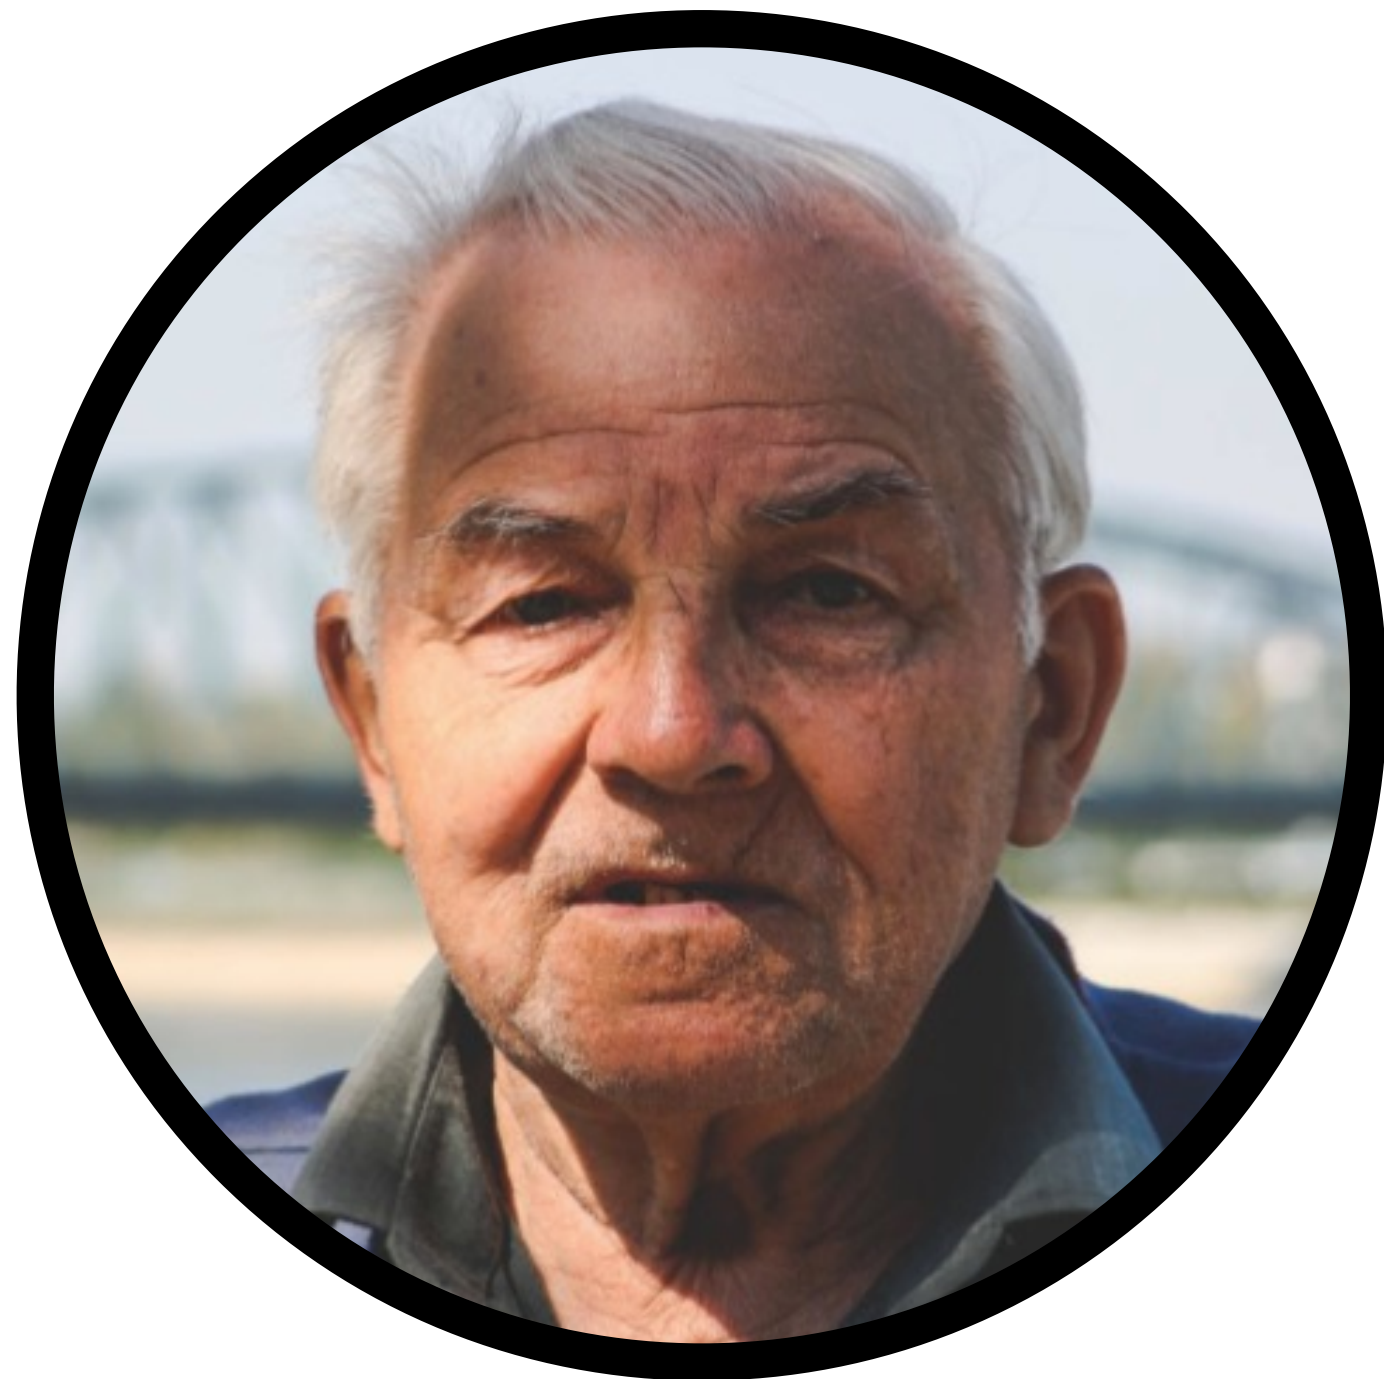

James (74)

|                                     |                                                                                                                                                                  |
|-------------------------------------|------------------------------------------------------------------------------------------------------------------------------------------------------------------|
| <b>FMA Total (Capacity)</b>         | <p>0   severe   moderate   mild   66<br/>41</p>                                                                                                                  |
| <b>FMA Distal   Proximal</b>        | <b>19</b> / 42 points   <b>22</b> / 24 points                                                                                                                    |
| <b>MAL Quantity (Performance)</b>   | <p>0   0.65   5</p>                                                                                                                                              |
| <b>MAL Quality (Performance)</b>    | <p>0   0.68   5</p>                                                                                                                                              |
| <b>Dominant &amp; Affected Side</b> | <ul style="list-style-type: none"> <li>• Right-handed</li> <li>• Right hemiparesis for <b>11 years</b></li> </ul>                                                |
| <b>Living Patterns</b>              | <ul style="list-style-type: none"> <li>• Lives with his wife</li> <li>• Ambulates with an ankle-foot orthosis</li> <li>• Driving a shuttle for living</li> </ul> |
| <b>Hobby</b>                        | <ul style="list-style-type: none"> <li>• Web-surfing</li> </ul>                                                                                                  |

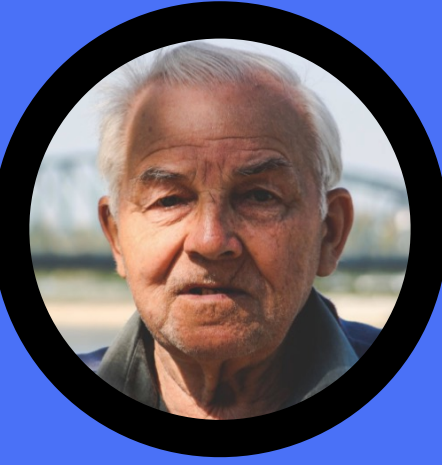

# Ratio of Affected Limb Use

**Ratio**

— Ratio of Affected Limb Use

**A-Duration**

— Duration of Affected Limb Use

**B-Duration**

— Duration of Bilateral Limb Use

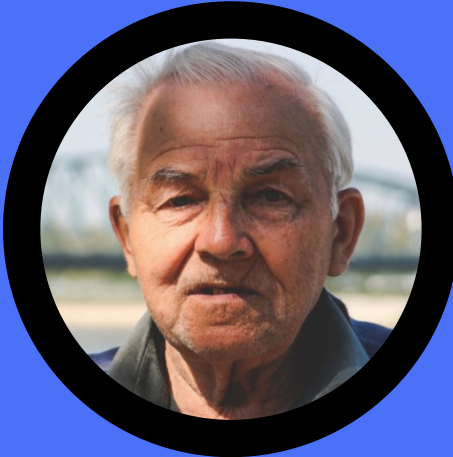

# Average Ratio for 2 Days

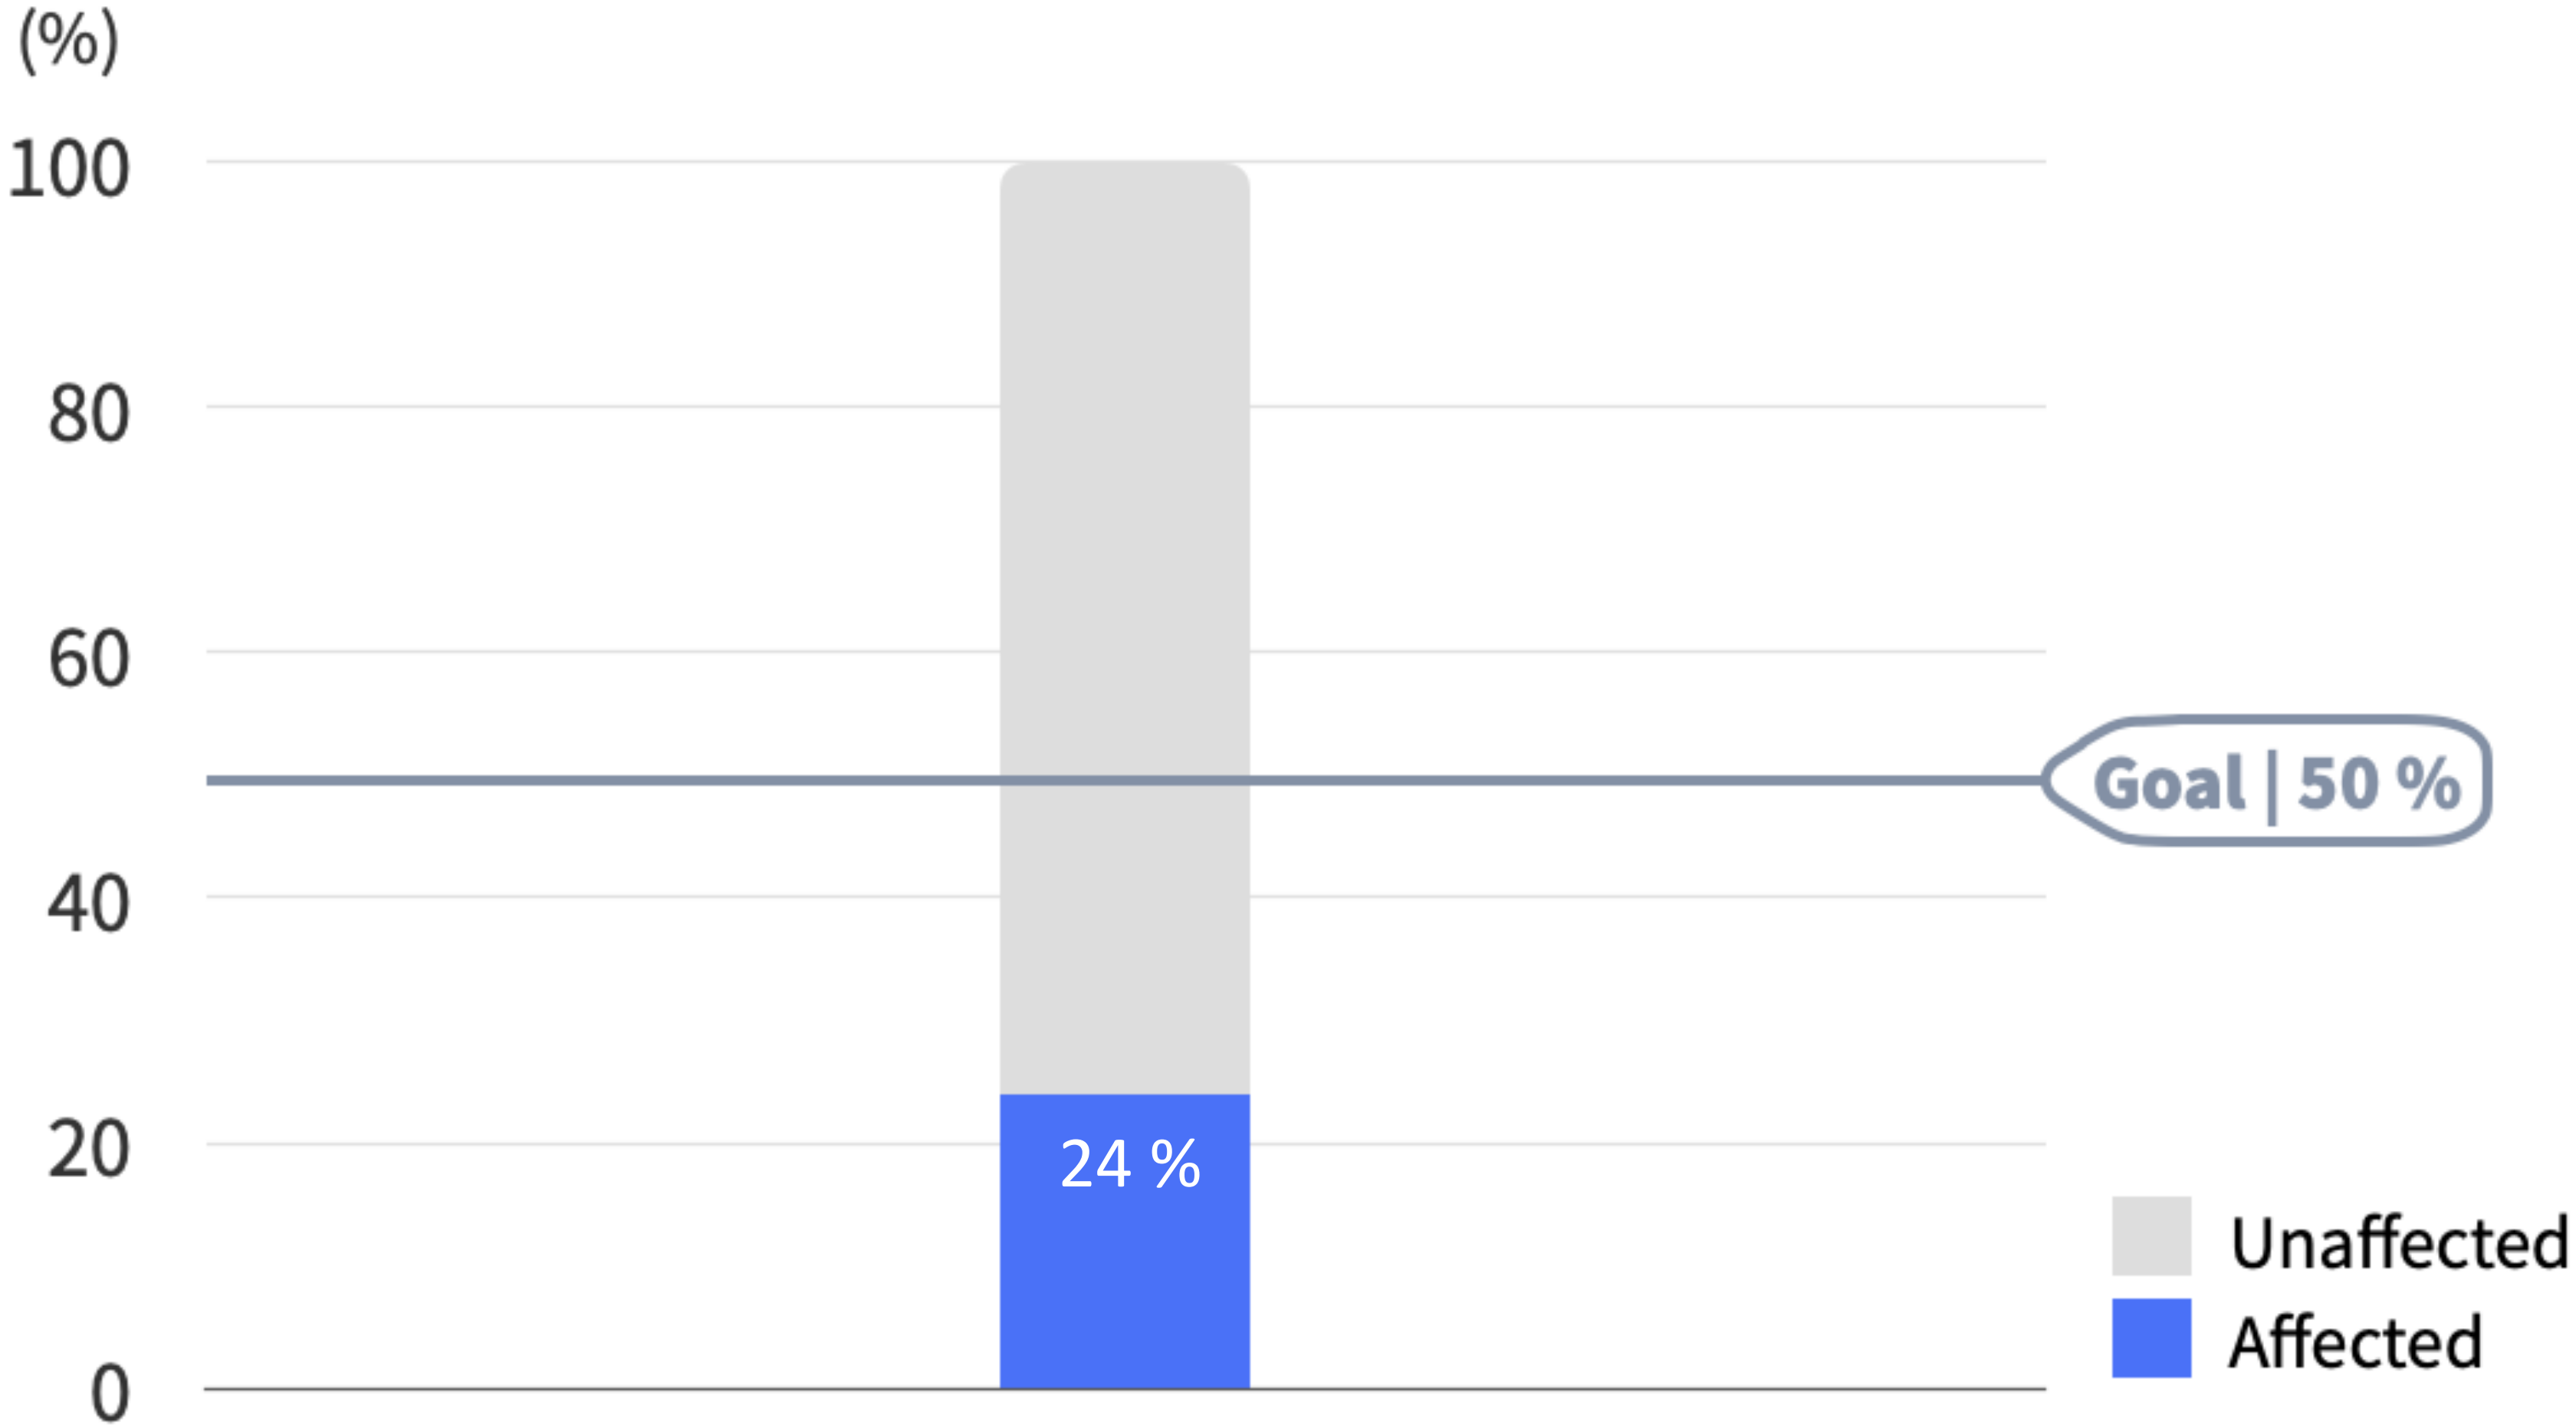

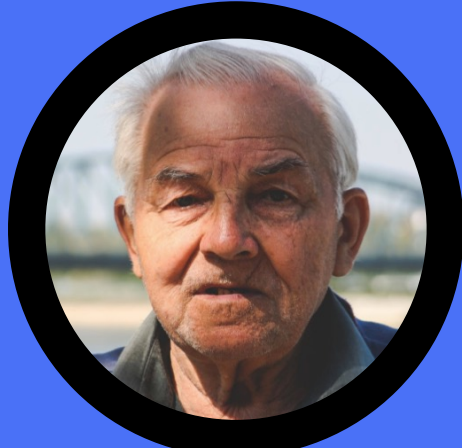

# Different Range and Granularity of Information Available

Aug 2019 - Jul 2020

Day Week Month Year

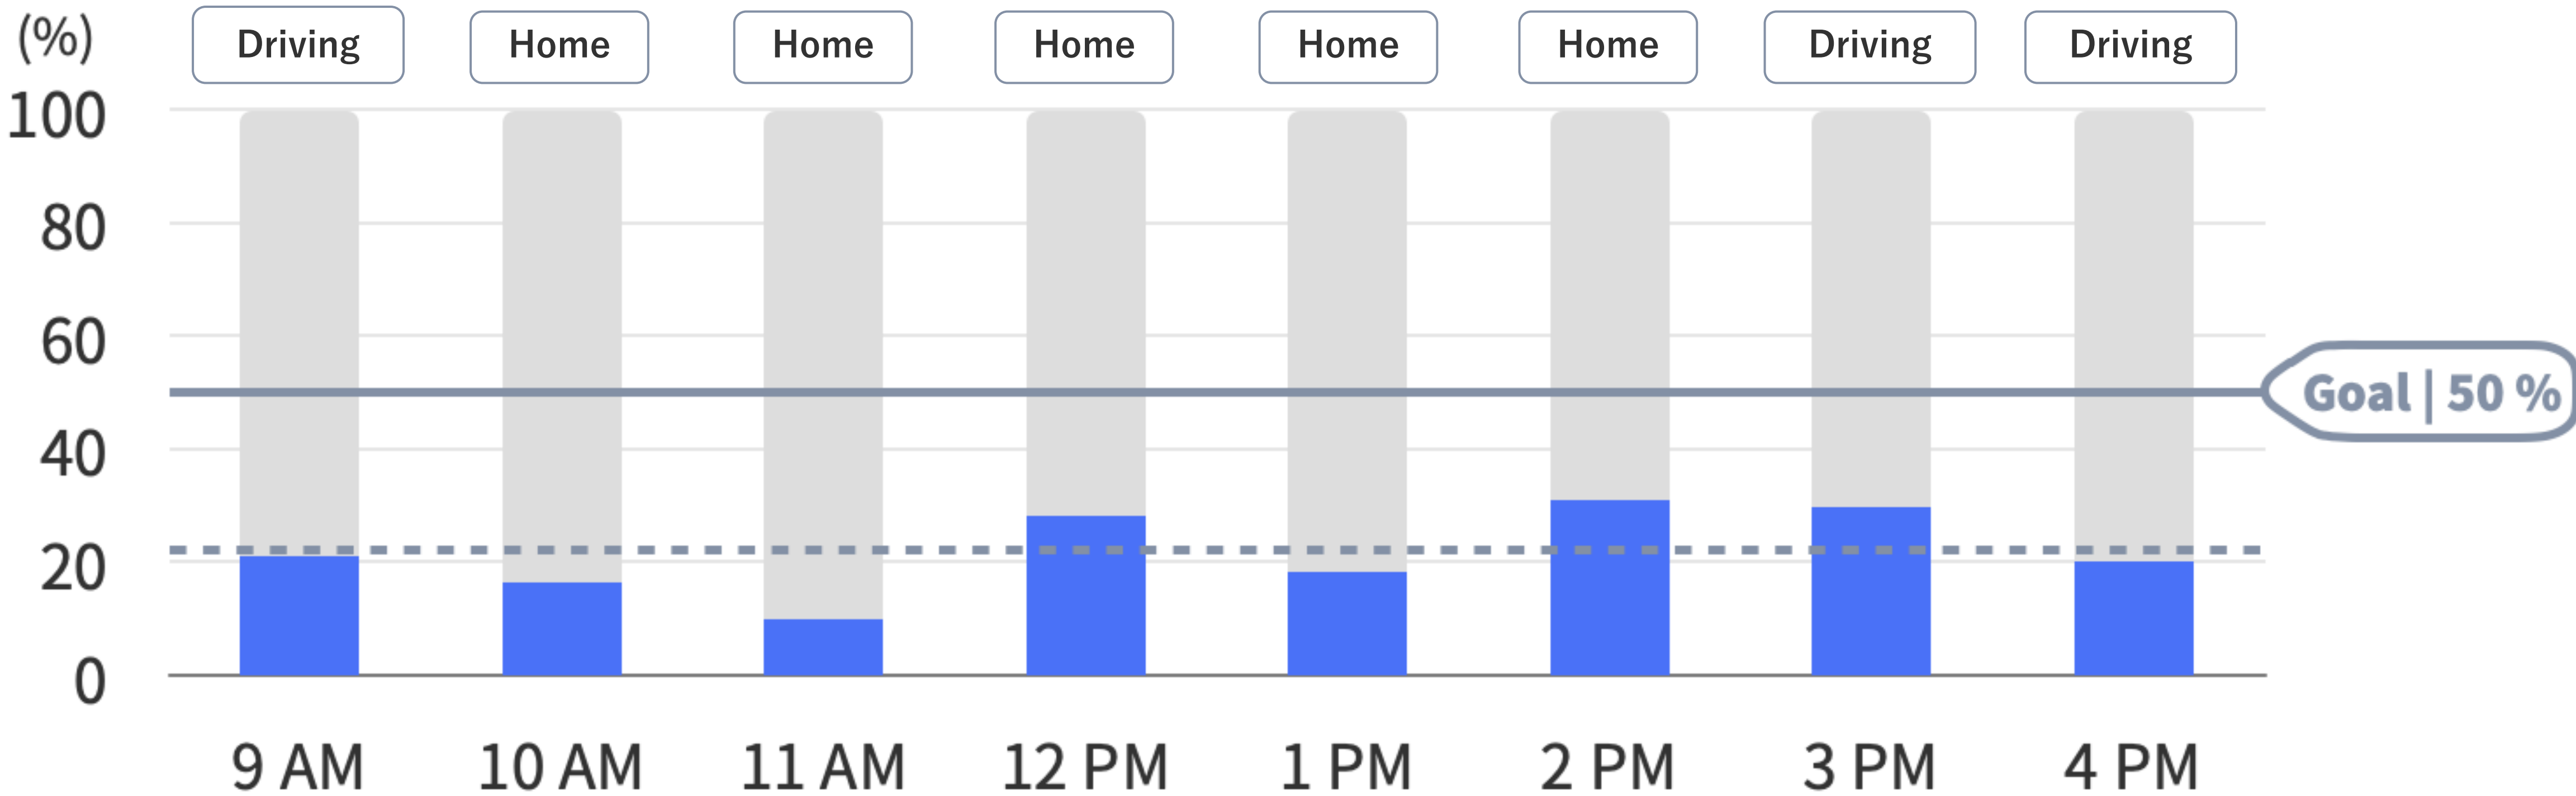

■ A-Ratio
 Average 22 %
Range 10 - 31 %

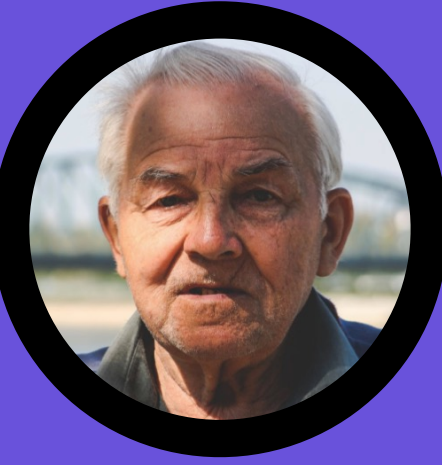

## Duration of Affected Limb Use

Ratio

— Ratio of Affected Limb Use

**A-Duration**

— Duration of Affected Limb Use

B-Duration

— Duration of Bilateral Limb Use

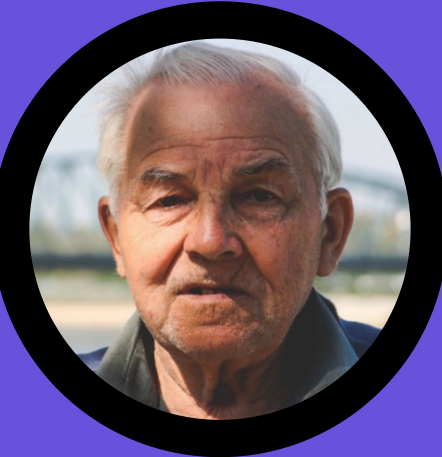

# Average A-Duration for 2 Days

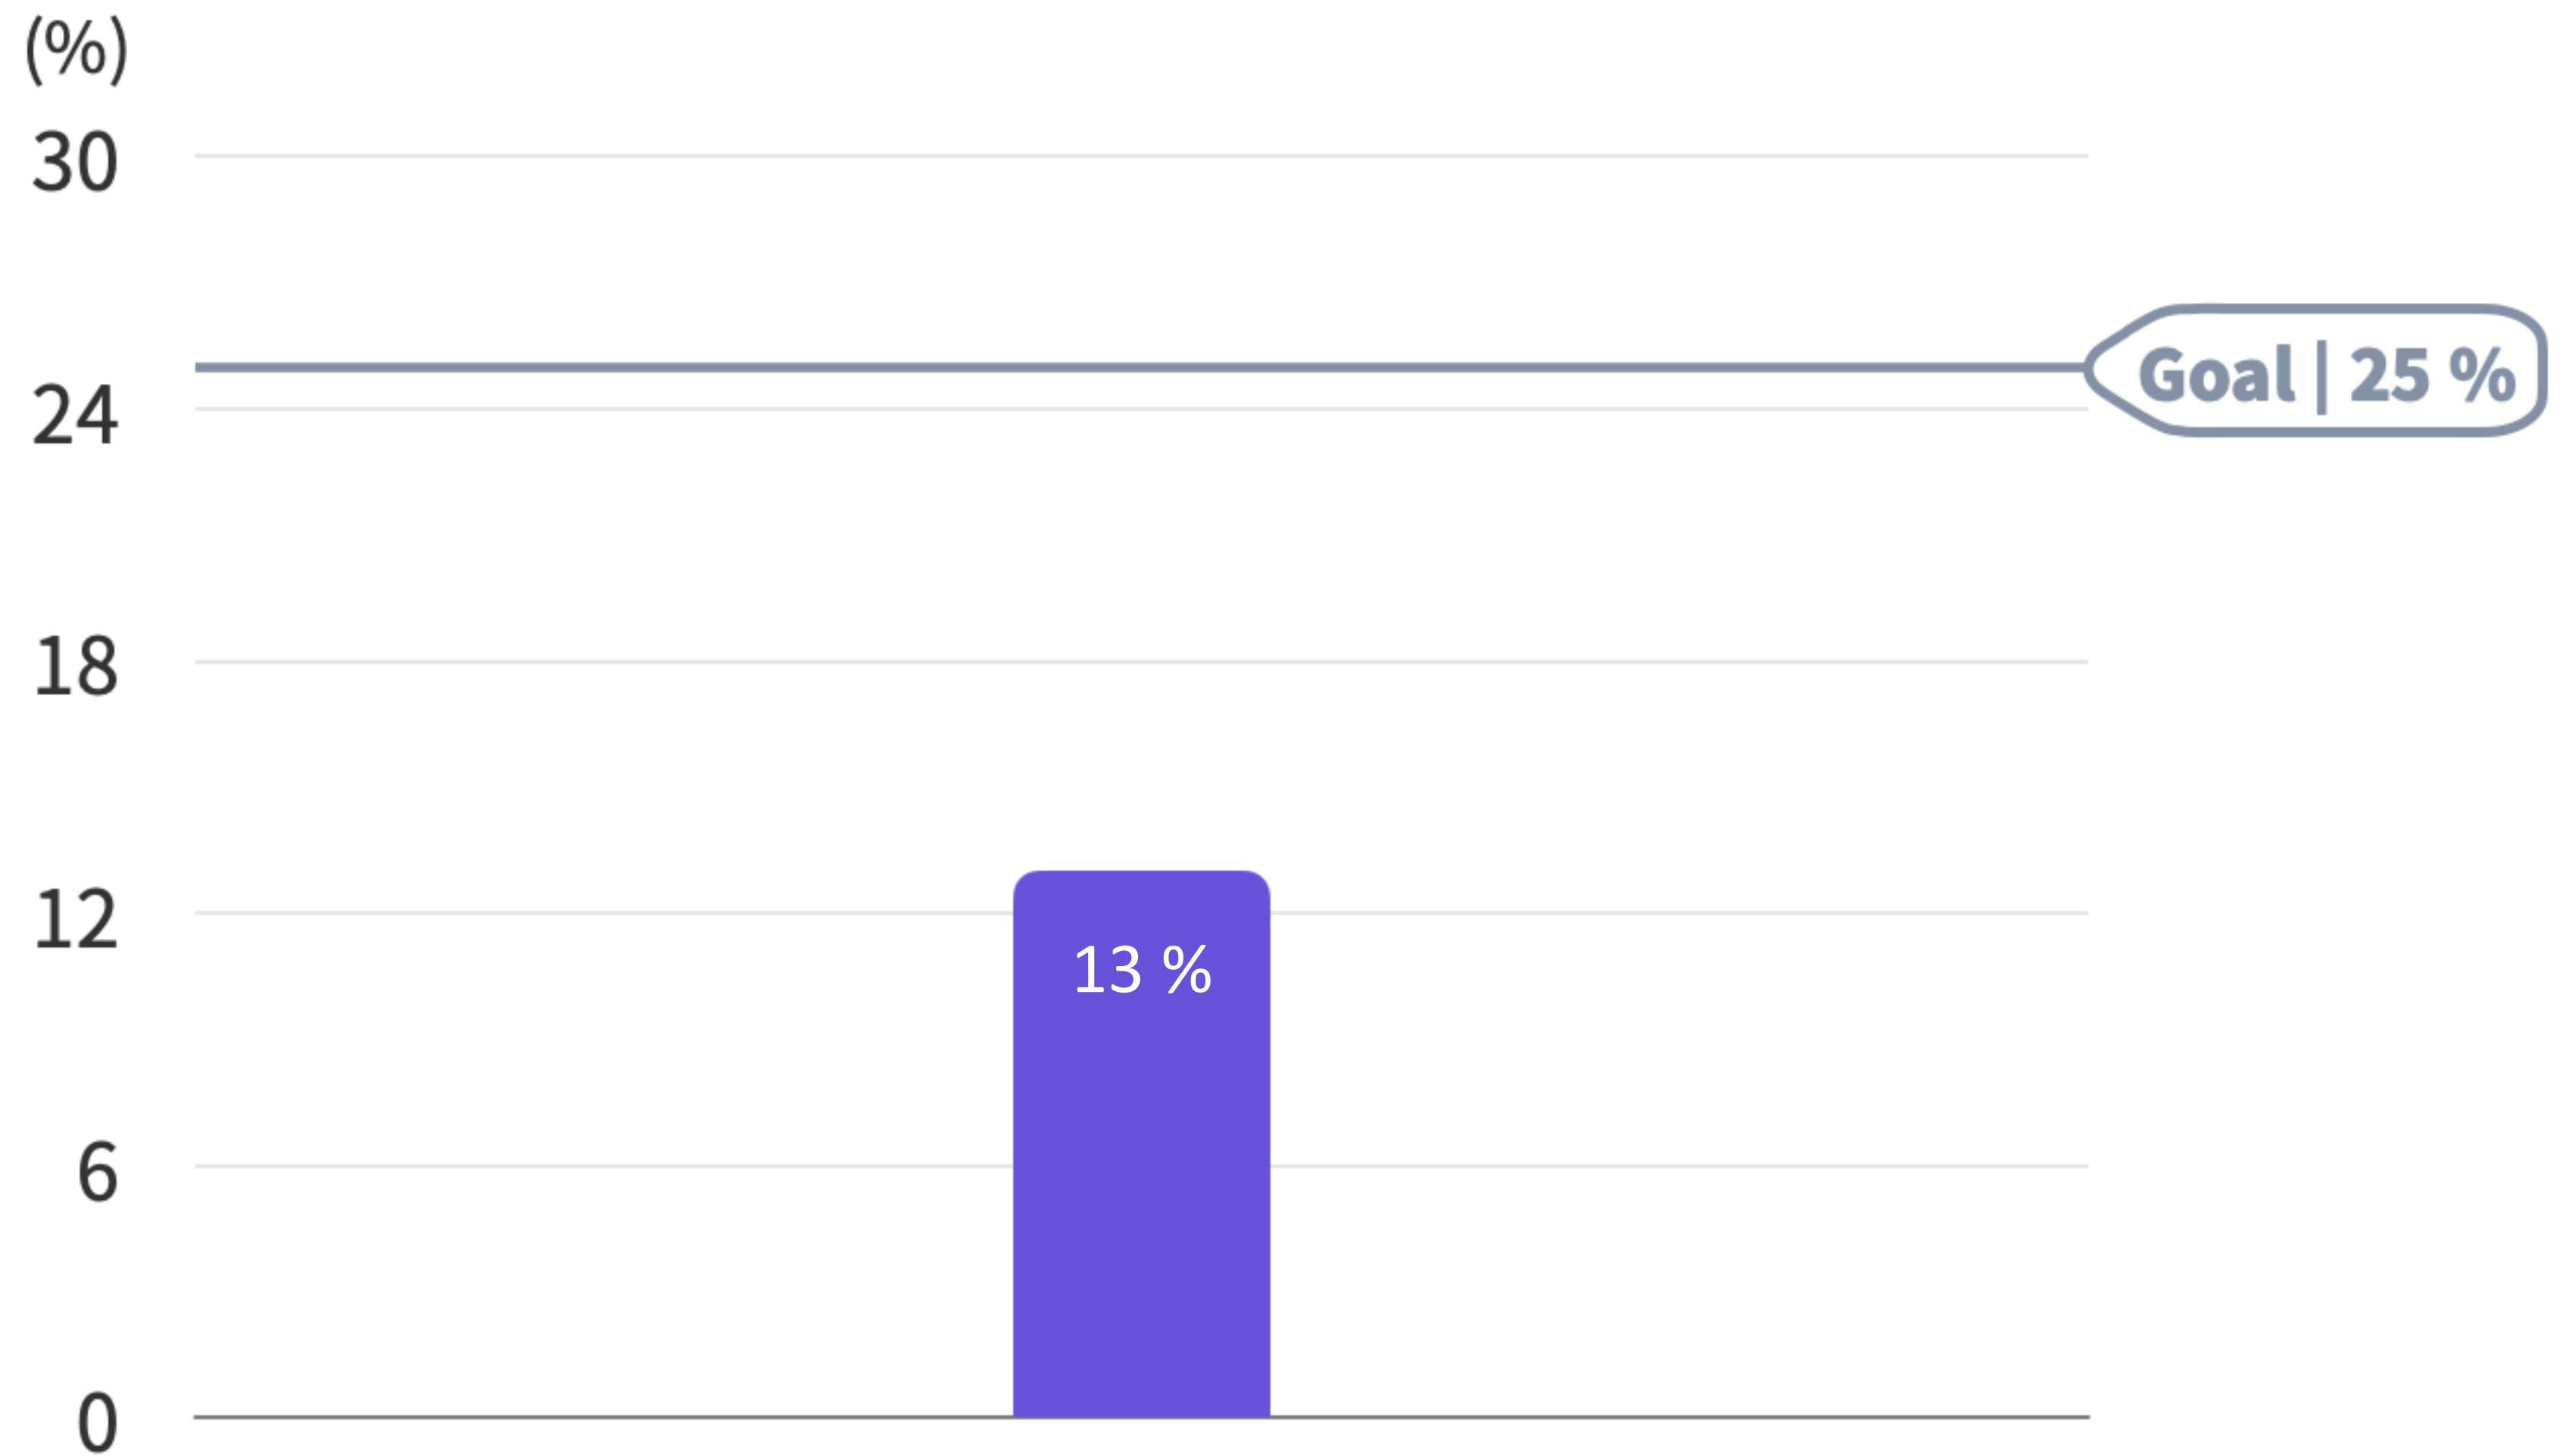



# Different Range and Granularity of Information Available

Aug 2019 - Jul 3, 2020

Day Week Month Year

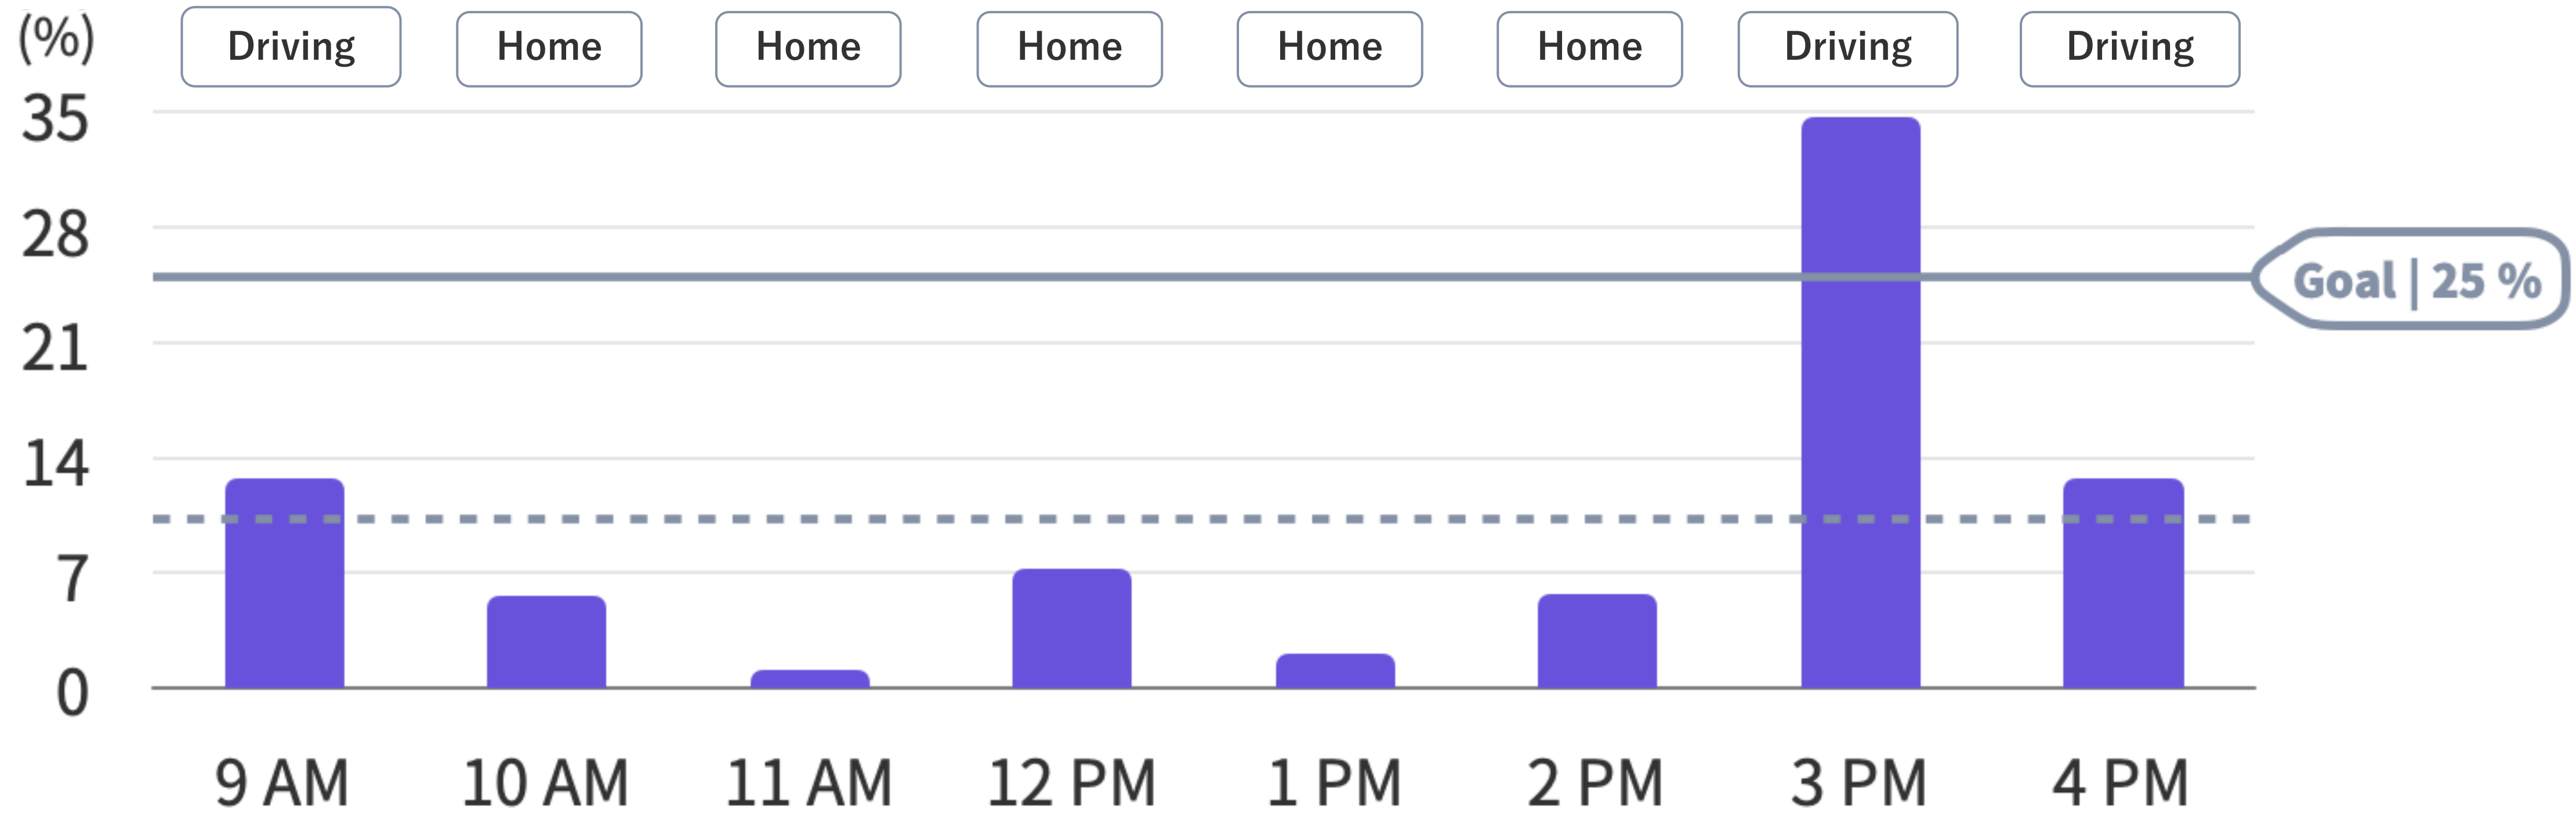

A-Duration

Average 10 %

Range 1.1 - 35 %



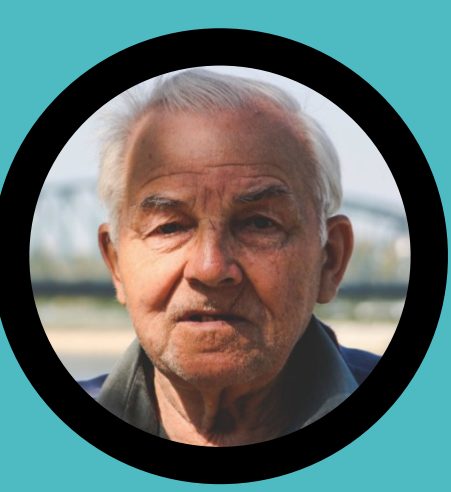

## Duration of Bilateral Limb Use

Ratio

— Ratio of Affected Limb Use

A-Duration

— Duration of Affected Limb Use

**B-Duration**

— Duration of Bilateral Limb Use

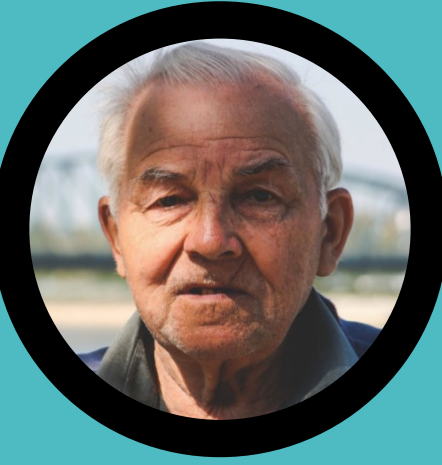

# Average B-Duration for 2 Days

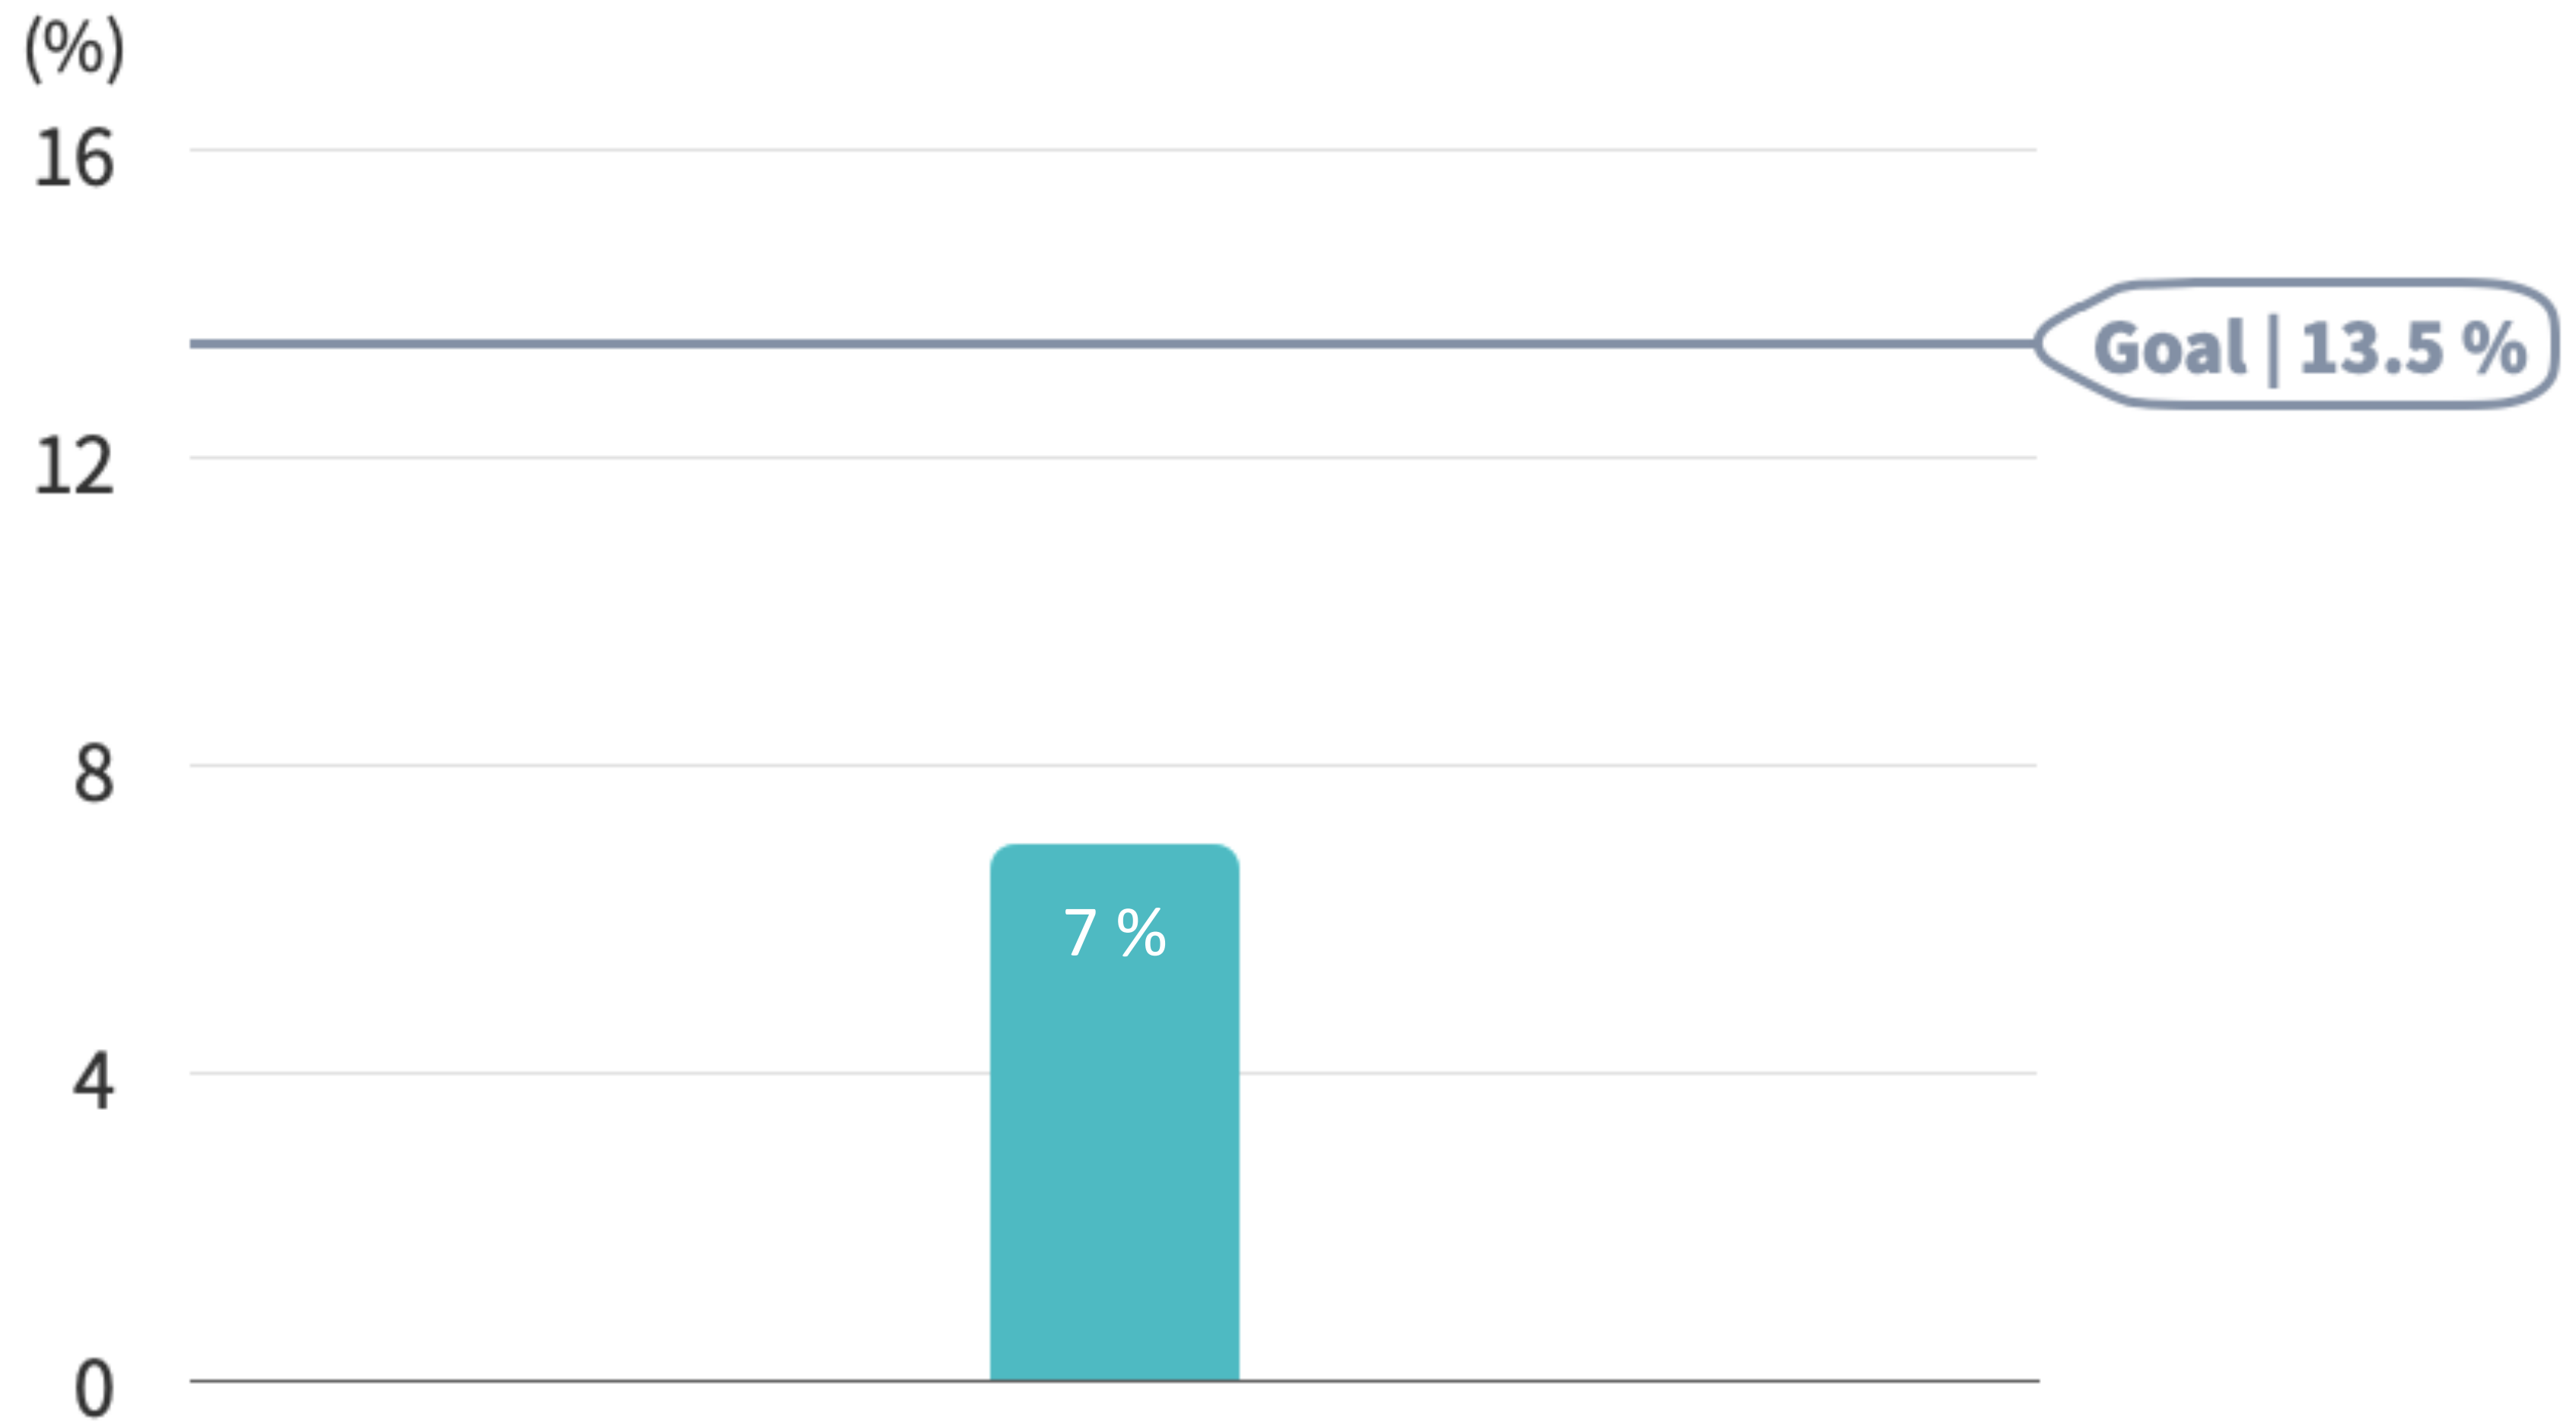

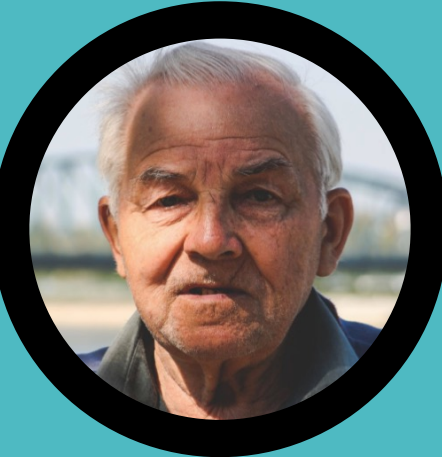

# Different Range and Granularity of Information Available

Aug 27, 2019 Jul 10, 2020

Day Week Month Year

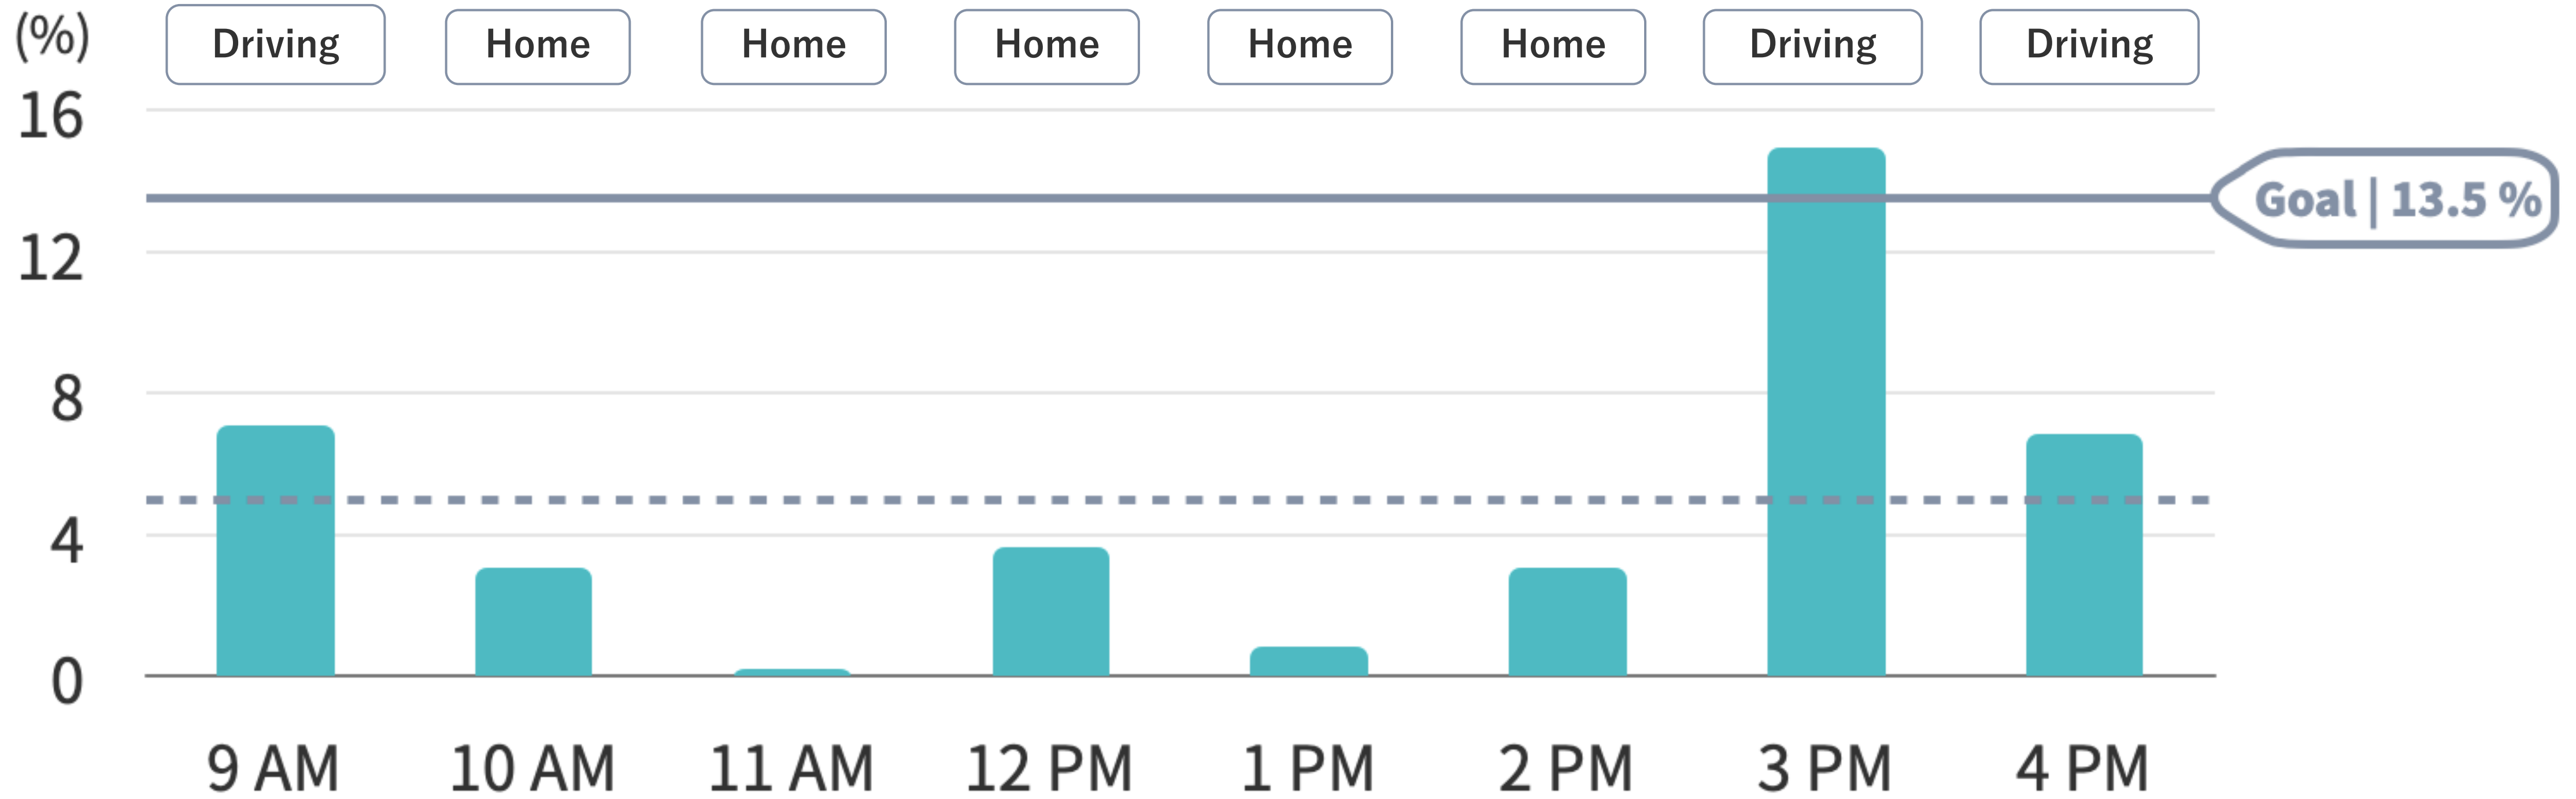

■ B-Duration      Average 5.0 %      Range 0.2 - 15 %

## Three Different Types of Information

**Ratio**

— Ratio of Affected Limb Use

**A-Duration**

— Duration of Affected Limb Use

**B-Duration**

— Duration of Bilateral Limb Use

## How Can Sensor-based Information Change Your Practice?

- A** Anticipated effects to your therapy practice
- B** Recommended use for patients

# Appendix
